# Supplementary material for: 2-Oxoindolin-thiazoline hybrids as scaffold-based therapeutics for T2DM-associated cognitive impairment: design, synthesis, in vitro and in silico studies
Source: Royal Society of Chemistry journal article supplement (doi:10.1039/d5md00628g), 2025-11-14
Supplement: d5md00628g1.pdf [file d5md00628g1.pdf]

## 2-Oxoindolin-Thiazoline Hybrids as Scaffold-Based Therapeutics for T2DM-Associated Cognitive Impairment: Design, Synthesis, *in vitro* and *in silico* studies

Wesam S Qayed <sup>a</sup>, Mostafa A Hassan <sup>a</sup>, Halil Şenol <sup>b</sup>, Parham Taslimi <sup>c</sup>, Tarek Aboul-Fadl <sup>a</sup>

<sup>a</sup> Department of Medicinal Chemistry, Faculty of Pharmacy, Assiut University, 71526 Assiut, Egypt

<sup>b</sup> Department of Pharmaceutical Chemistry, Faculty of Pharmacy, Bezmialem Vakif University, 34093 Fatih, İstanbul, Türkiye

<sup>c</sup> Department of Biotechnology, Faculty of Science, Bartın University, 74110 Bartın, Türkiye

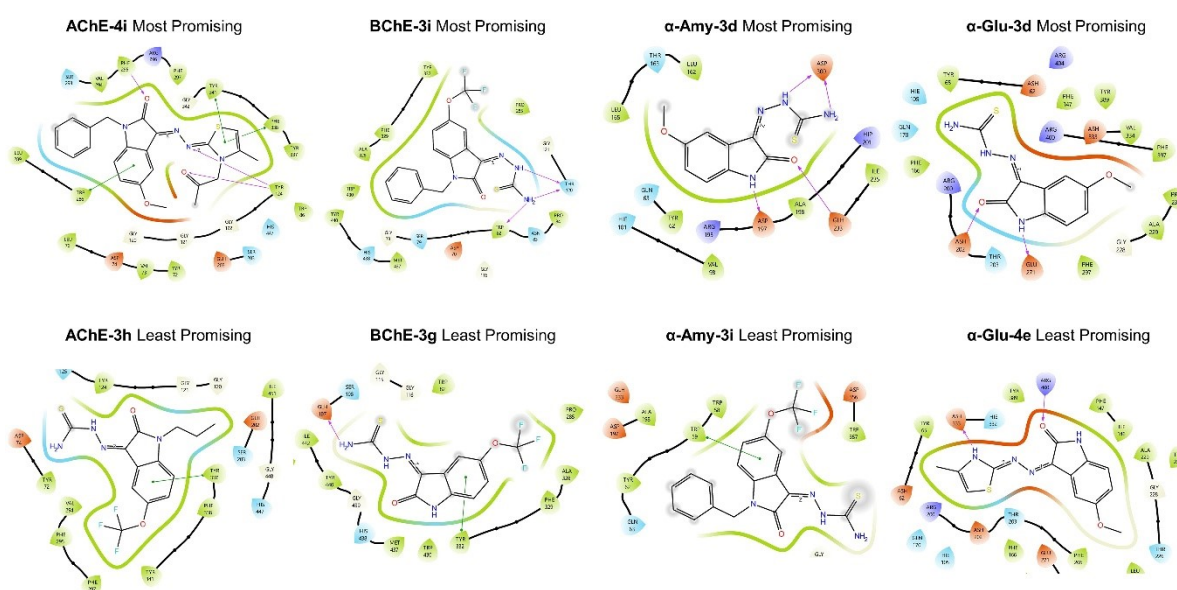

**Fig. S1.** Comparison of docking poses of the most and least active compounds for each target

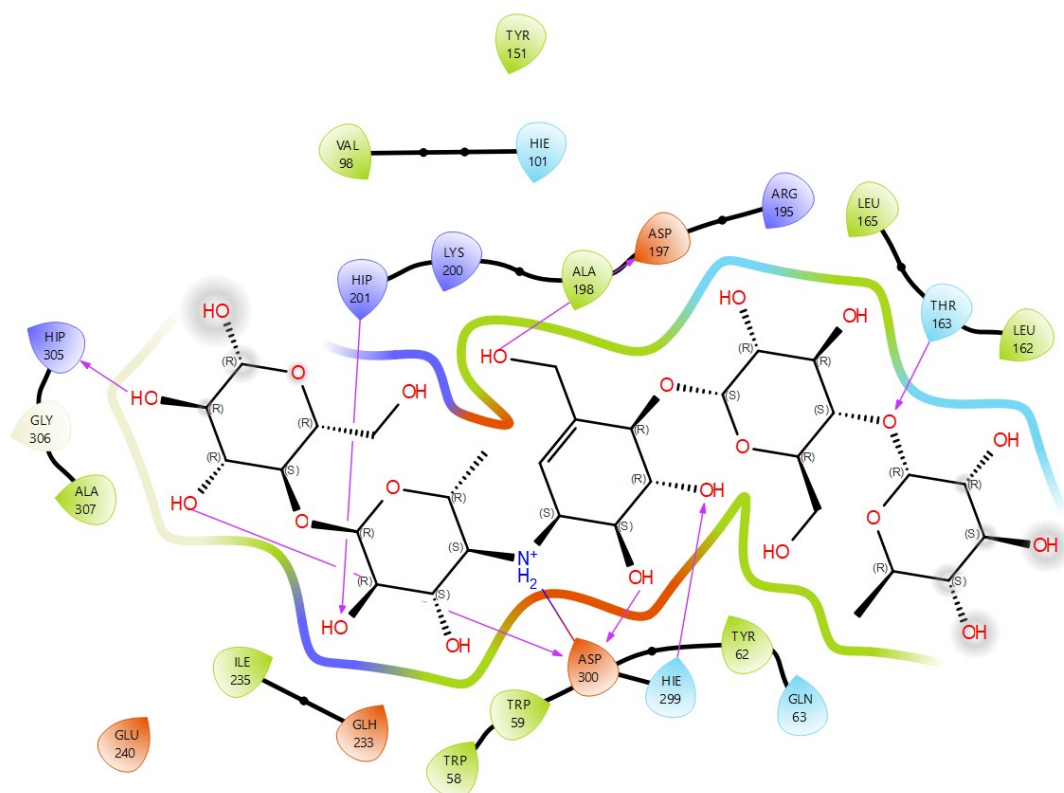

**Fig. S2.** 2D Ligand Protein interactions of Acarbose- $\alpha$ -Amy complex

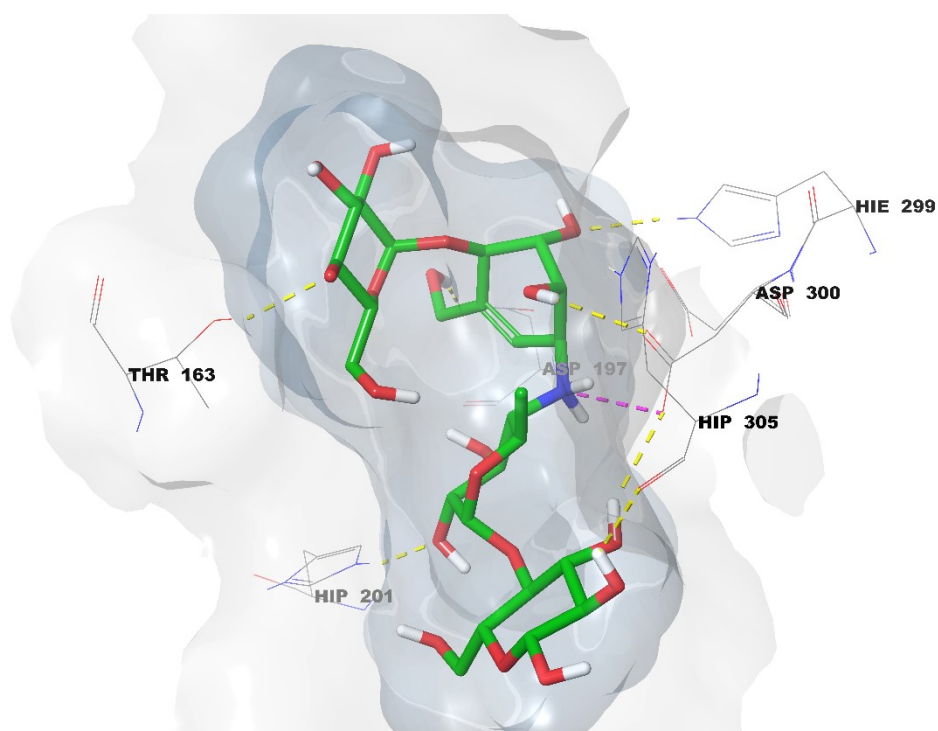

**Fig. S3.** 3D Ligand Protein interactions of Acarbose- $\alpha$ -Amy complex

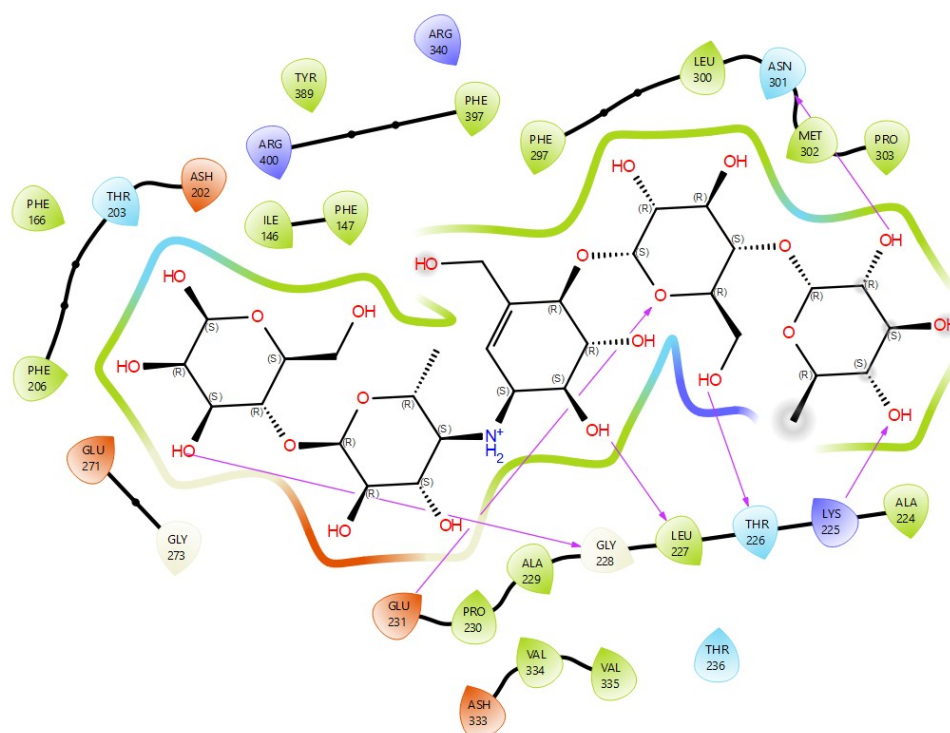

**Fig. S4.** 2D Ligand Protein interactions of Acarbose- $\alpha$ -Glu complex

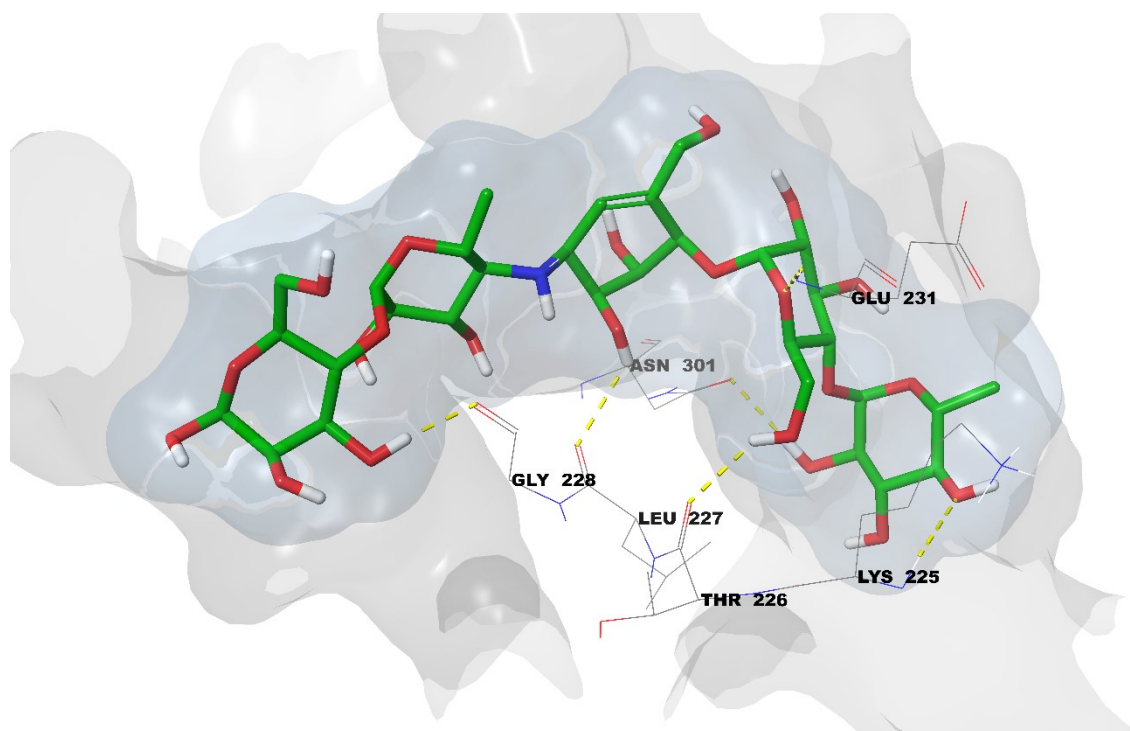

**Fig. S5.** 3D Ligand Protein interactions of Acarbose- $\alpha$ -Glu complex

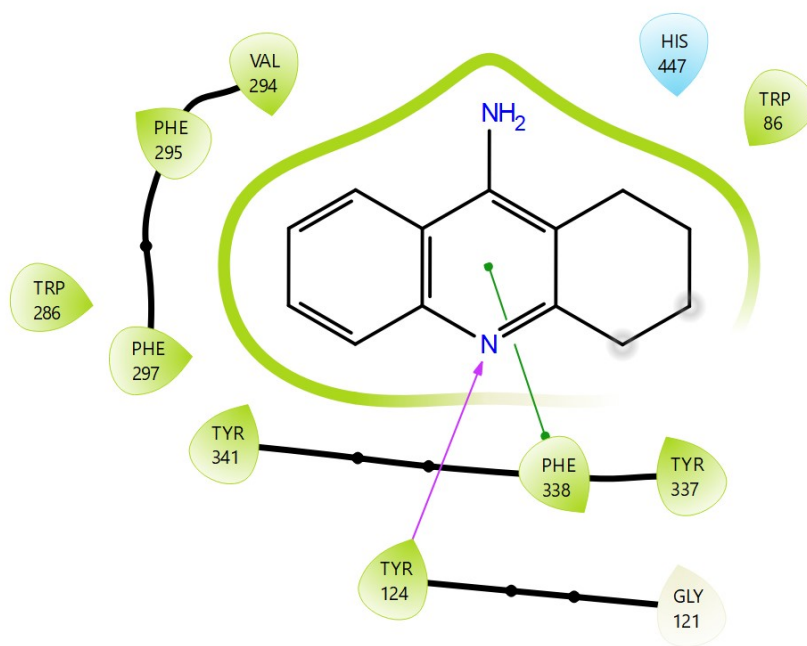

**Fig. S6.** 2D Ligand Protein interactions of Tacrine-AChE complex

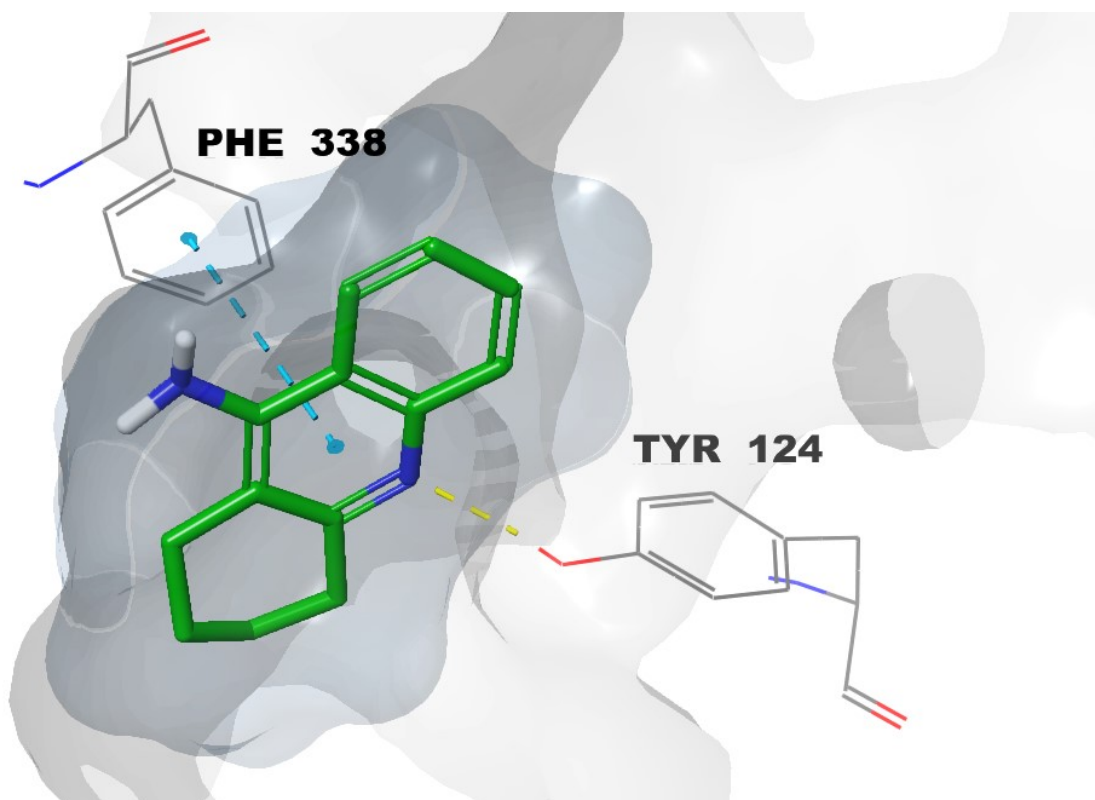

**Fig. S7.** 3D Ligand Protein interactions of Tacrine-AChE complex

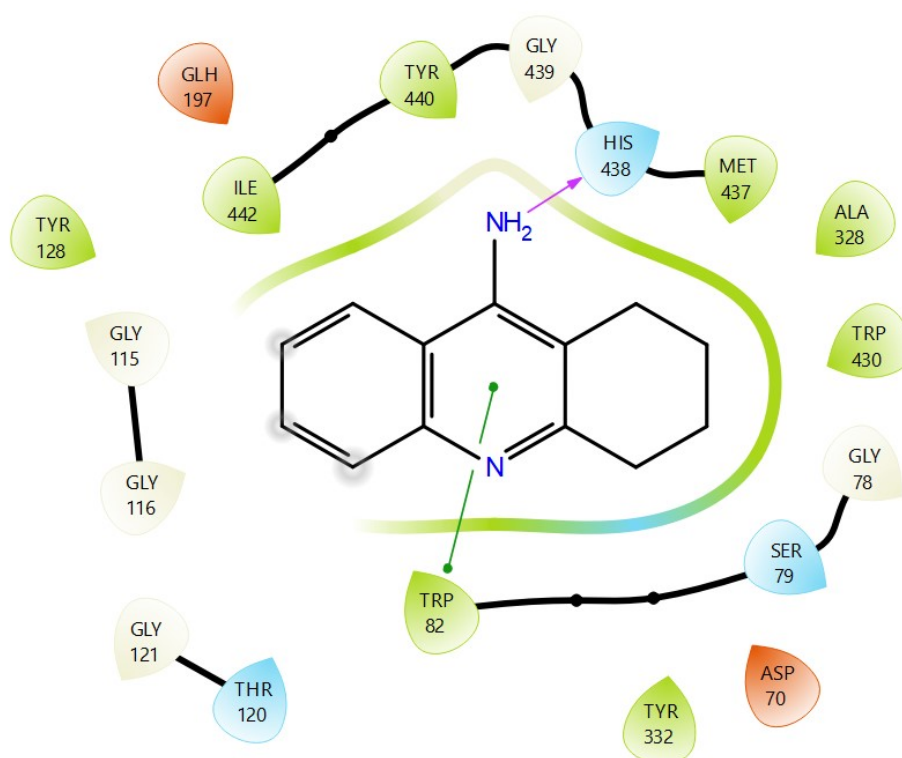

**Fig. S8.** 2D Ligand Protein interactions of Tacrine-BChE complex

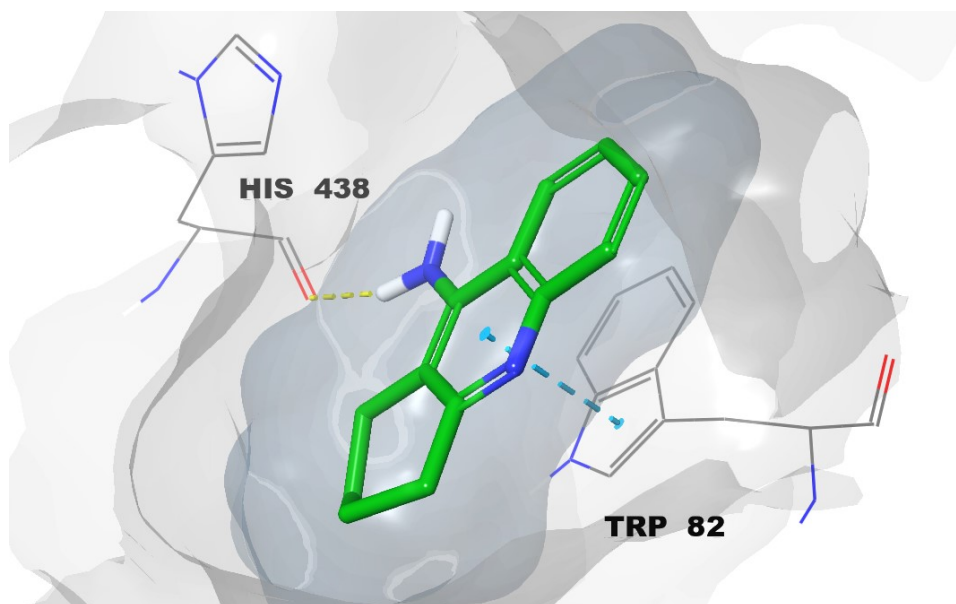

**Fig. S9.** 3D Ligand Protein interactions of Tacrine-BChE complex



## Compound Characterization

### $^1\text{H}$ and $^{13}\text{C}$ NMR spectra of compound **4a**

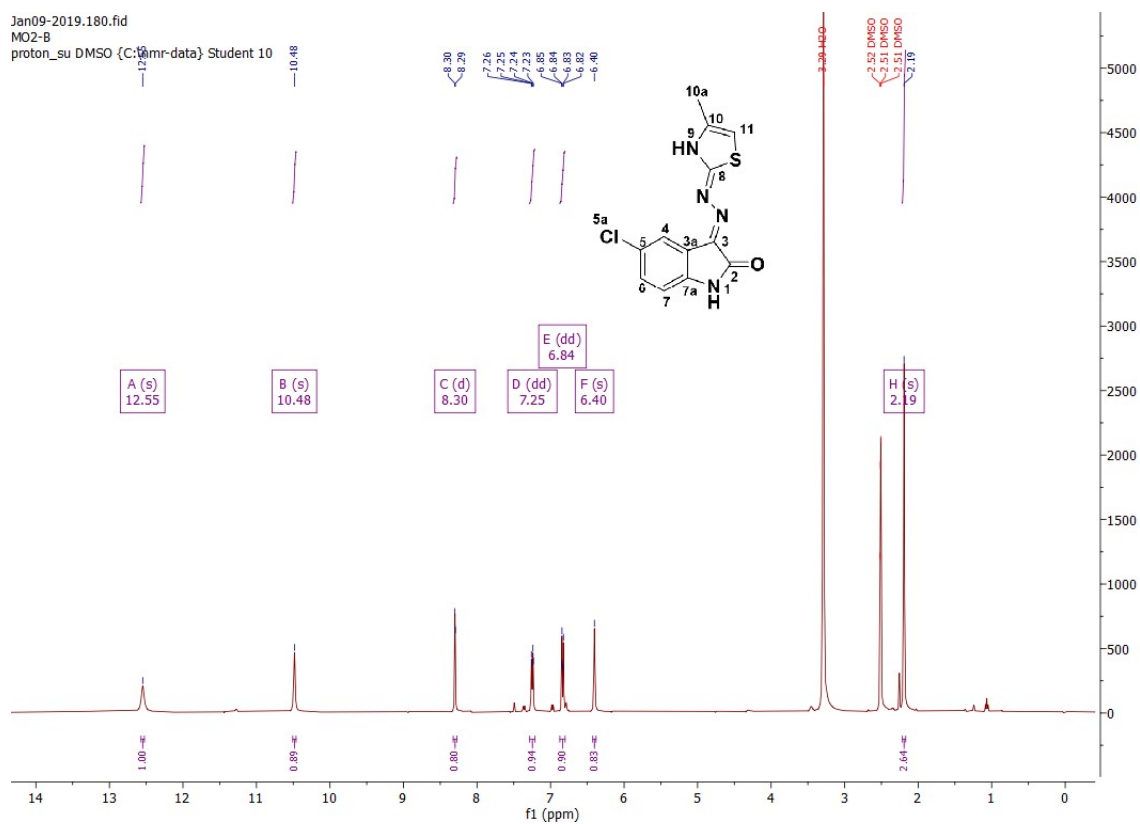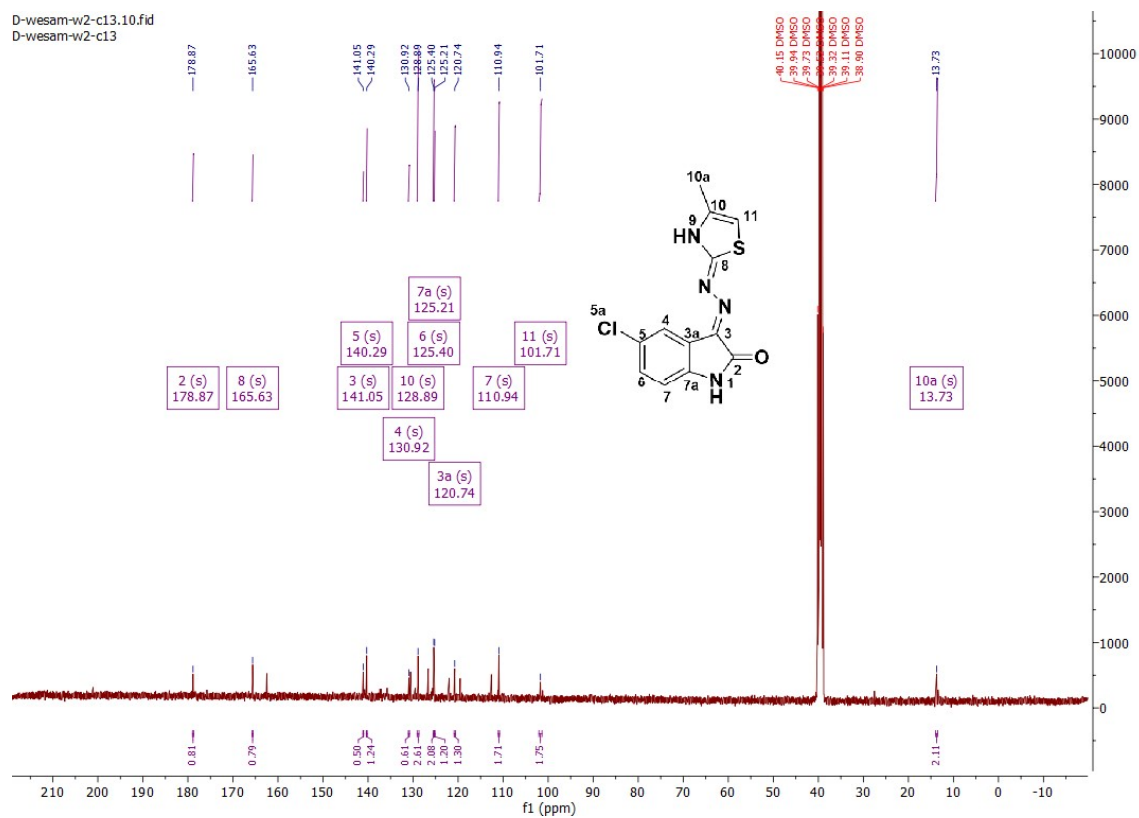

# <sup>1</sup>H and <sup>13</sup>C NMR spectra of compound 4b

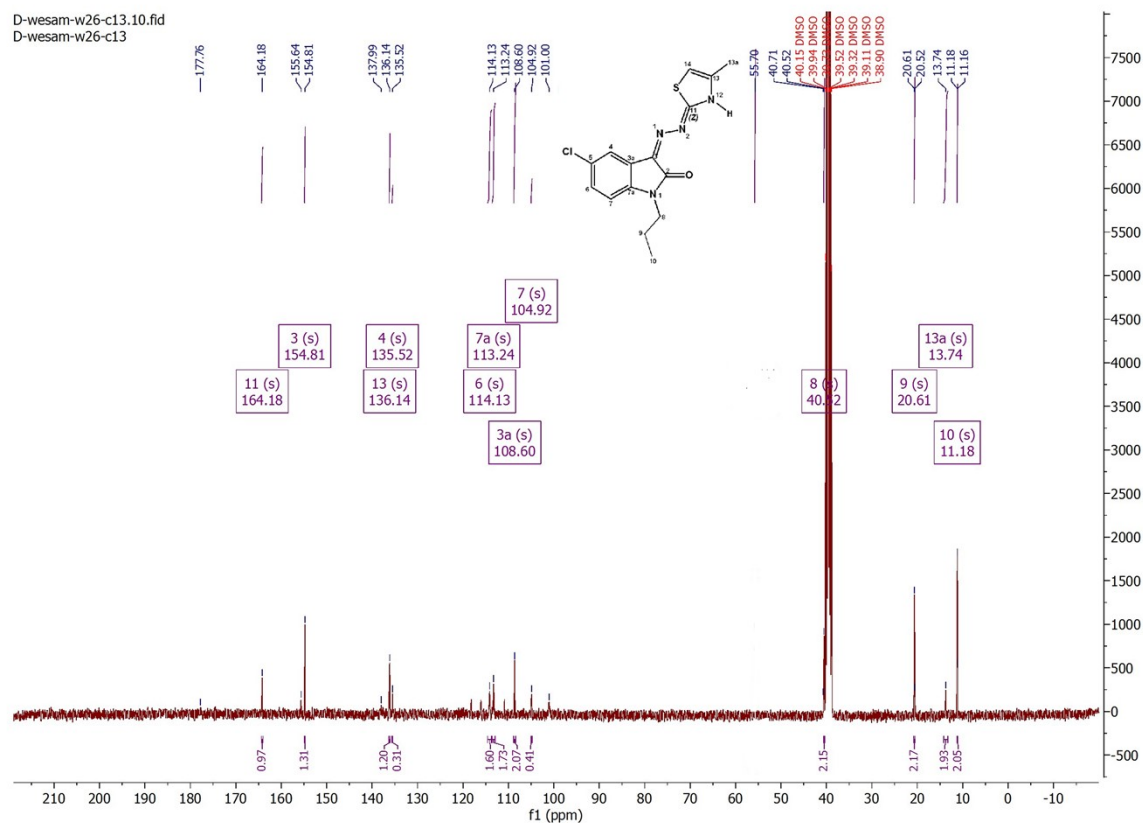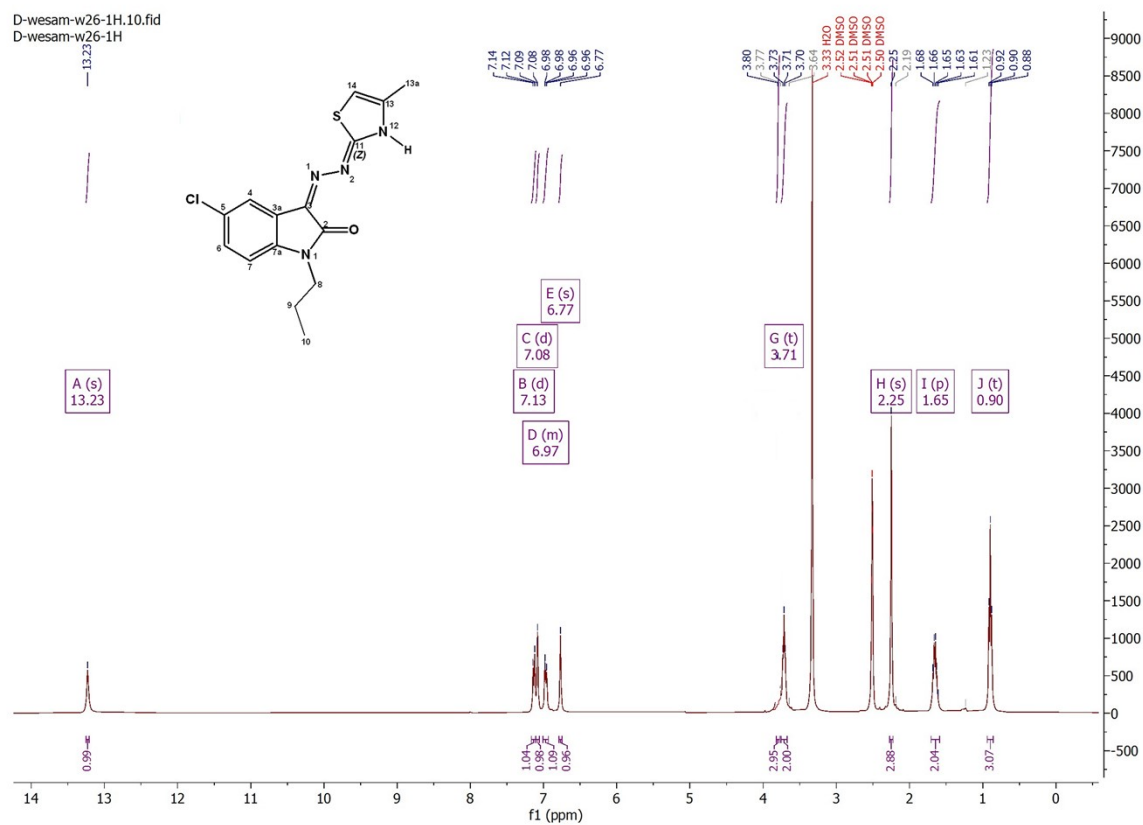

# <sup>1</sup>H and <sup>13</sup>C NMR spectra of compound 4c

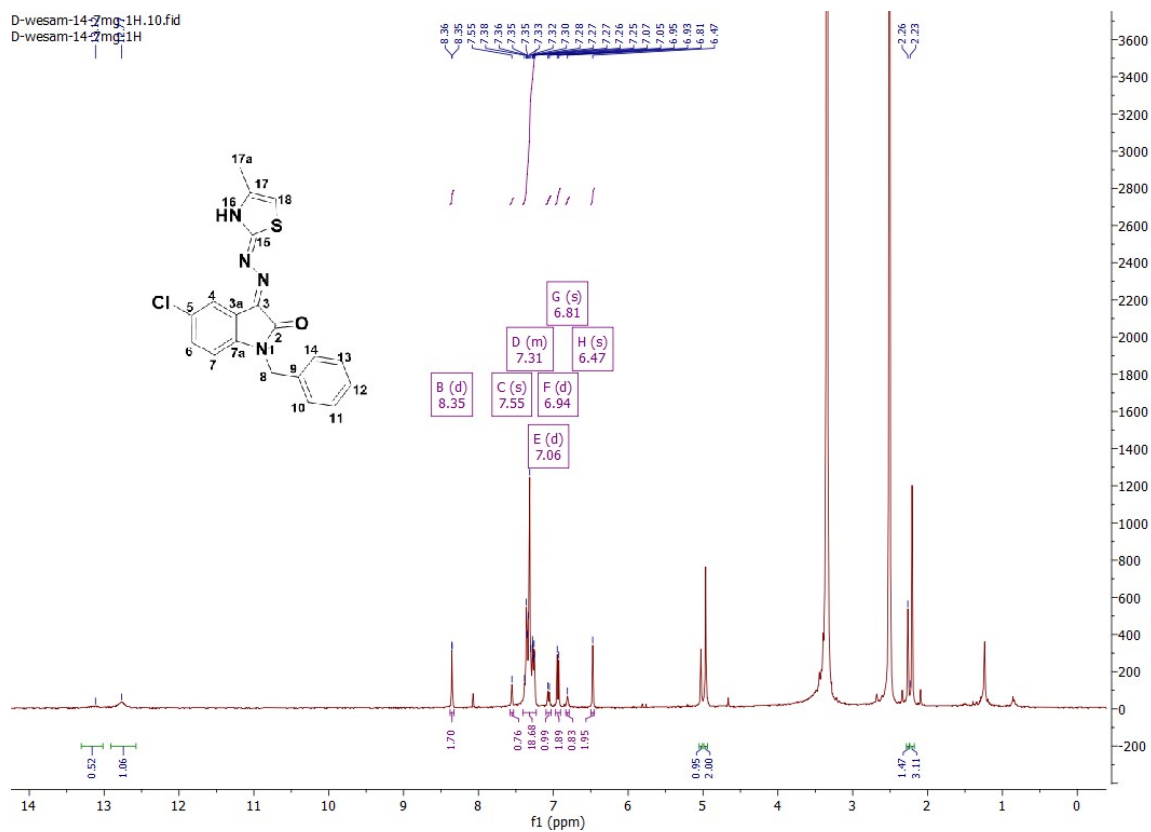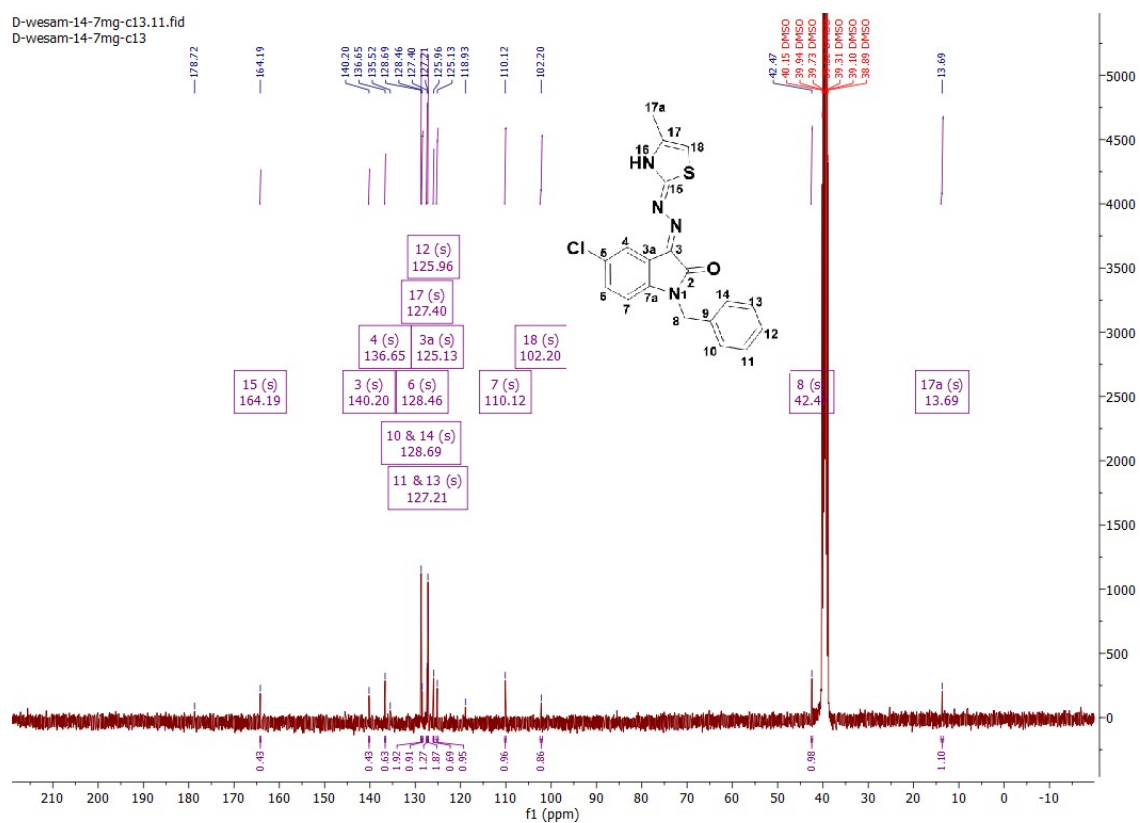<sup>1</sup>H and <sup>13</sup>C NMR spectra of compound **4d**



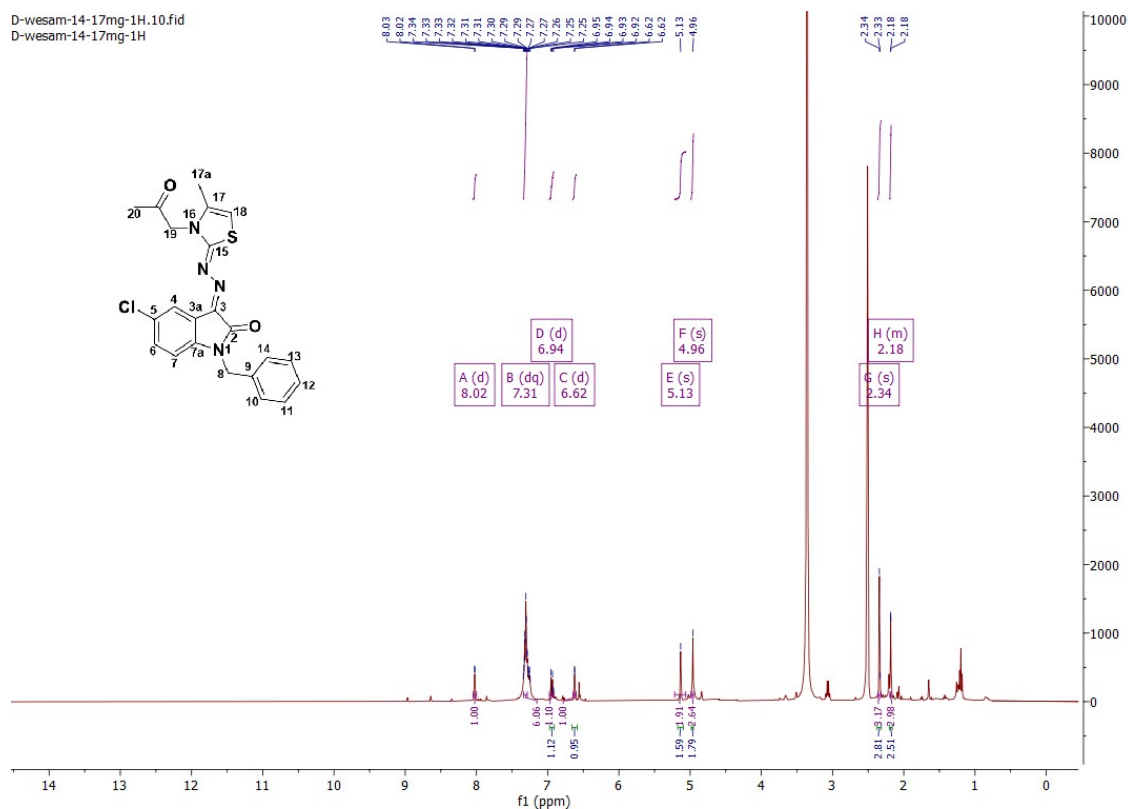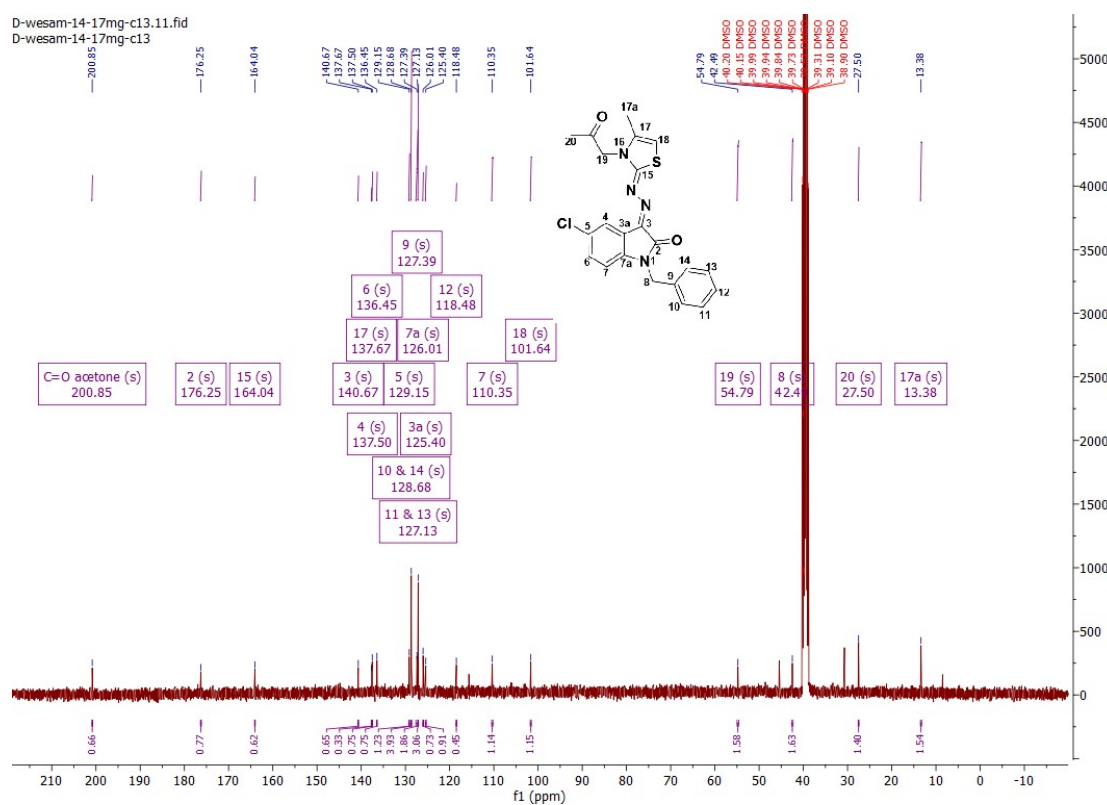

$^1\text{H}$  and  $^{13}\text{C}$  NMR spectra of compound 4e

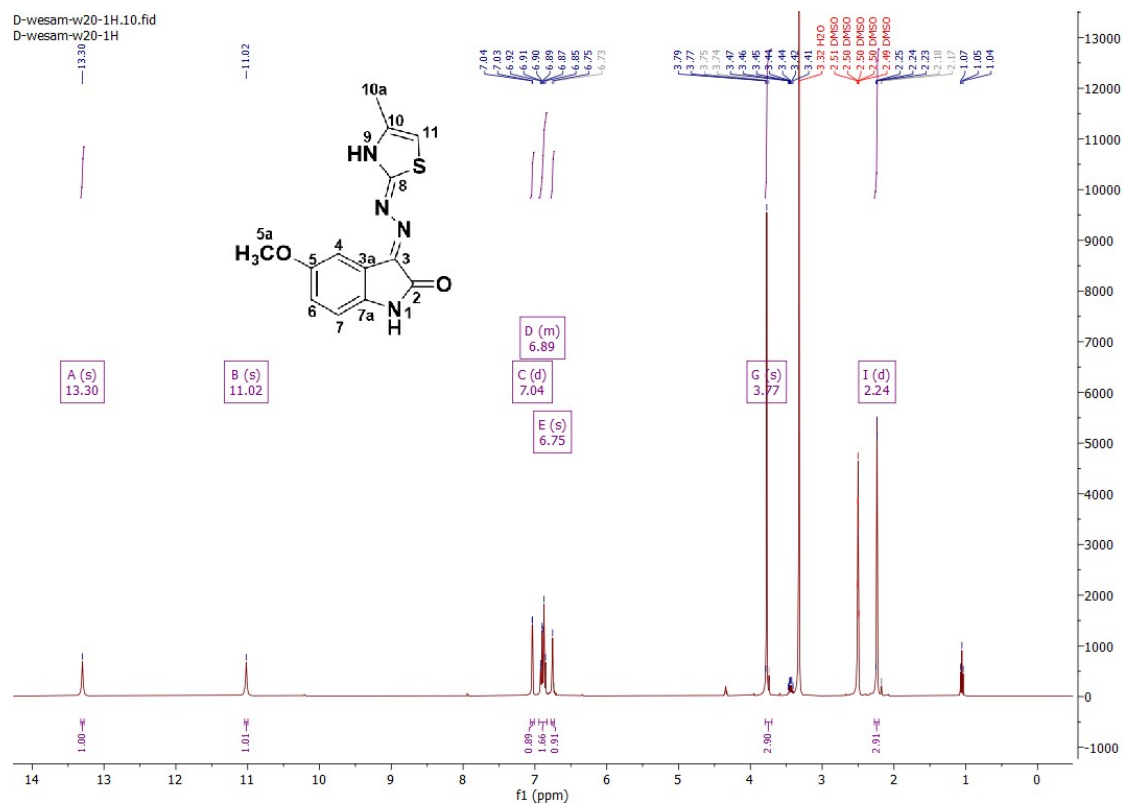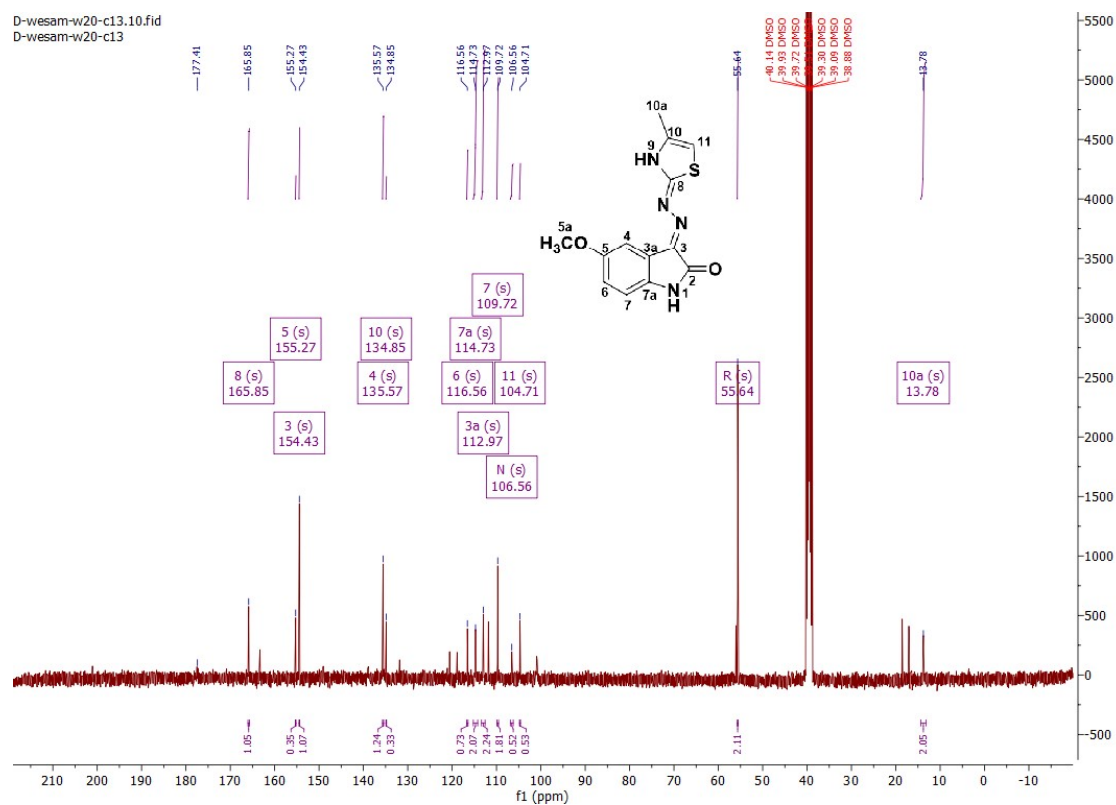

<sup>1</sup>H and <sup>13</sup>C NMR spectra of compound **4f**

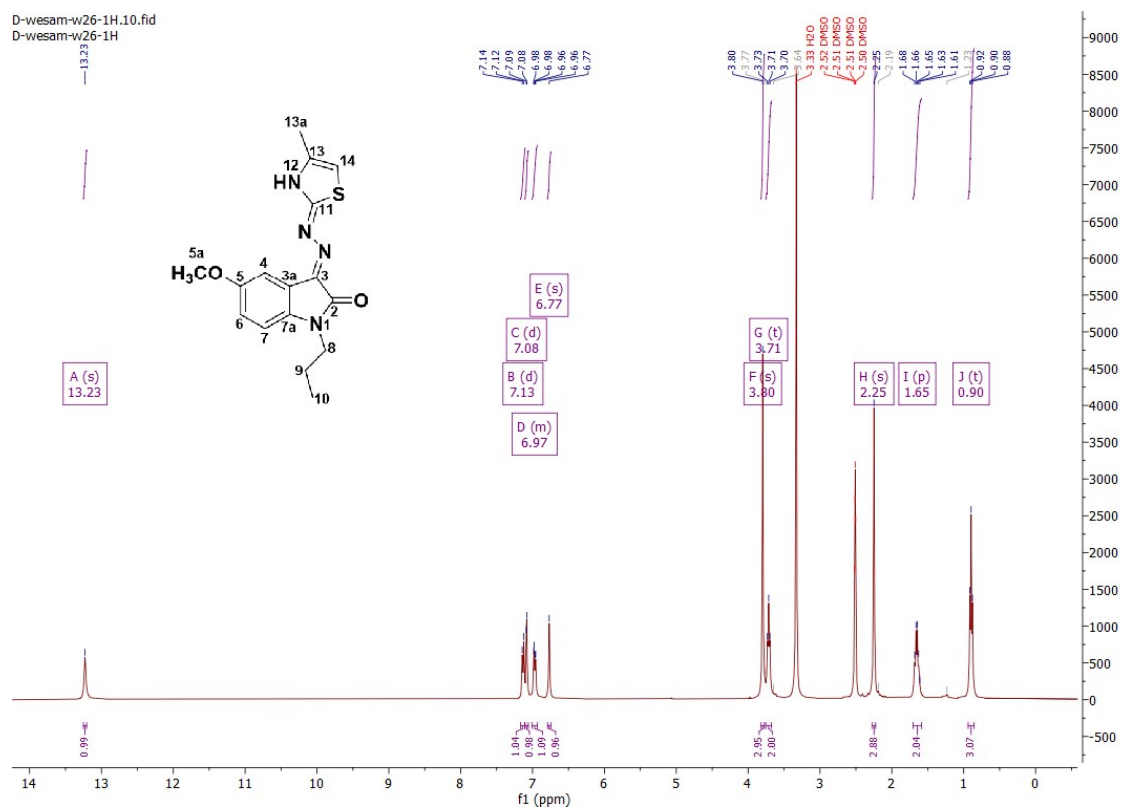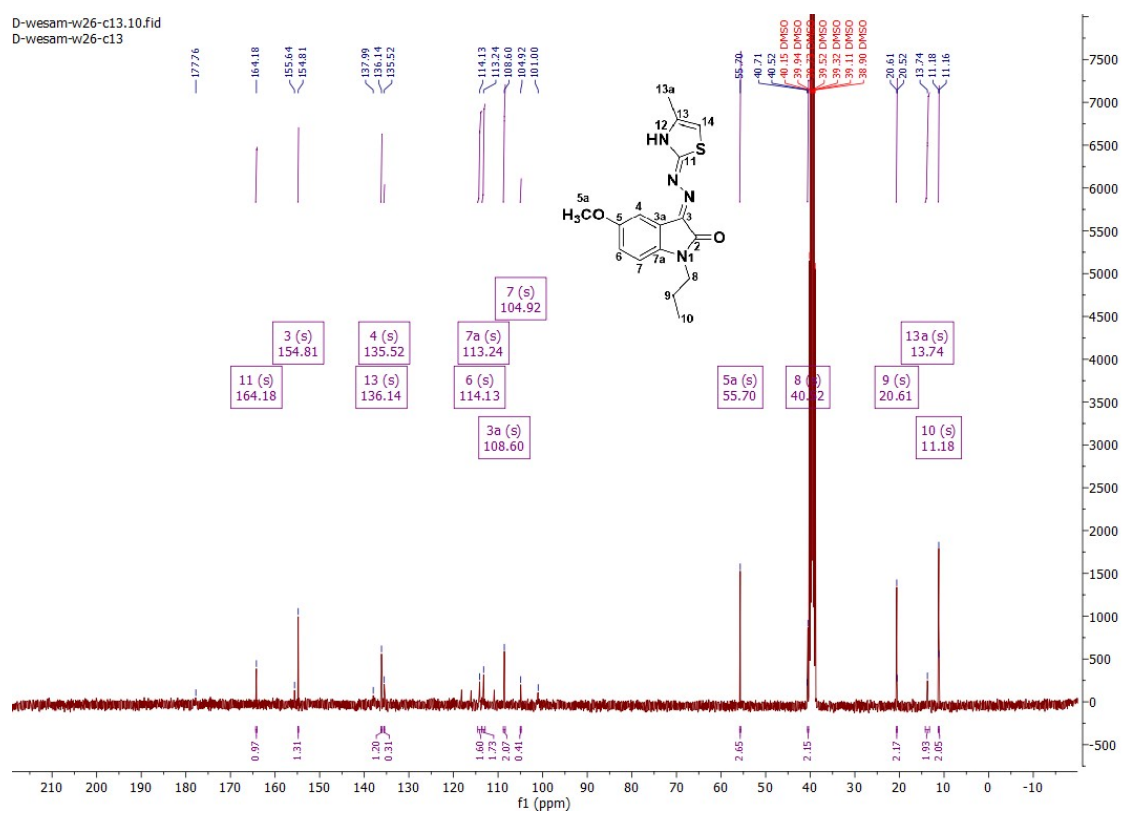

$^1\text{H}$  and  $^{13}\text{C}$  NMR spectra of compound 4g

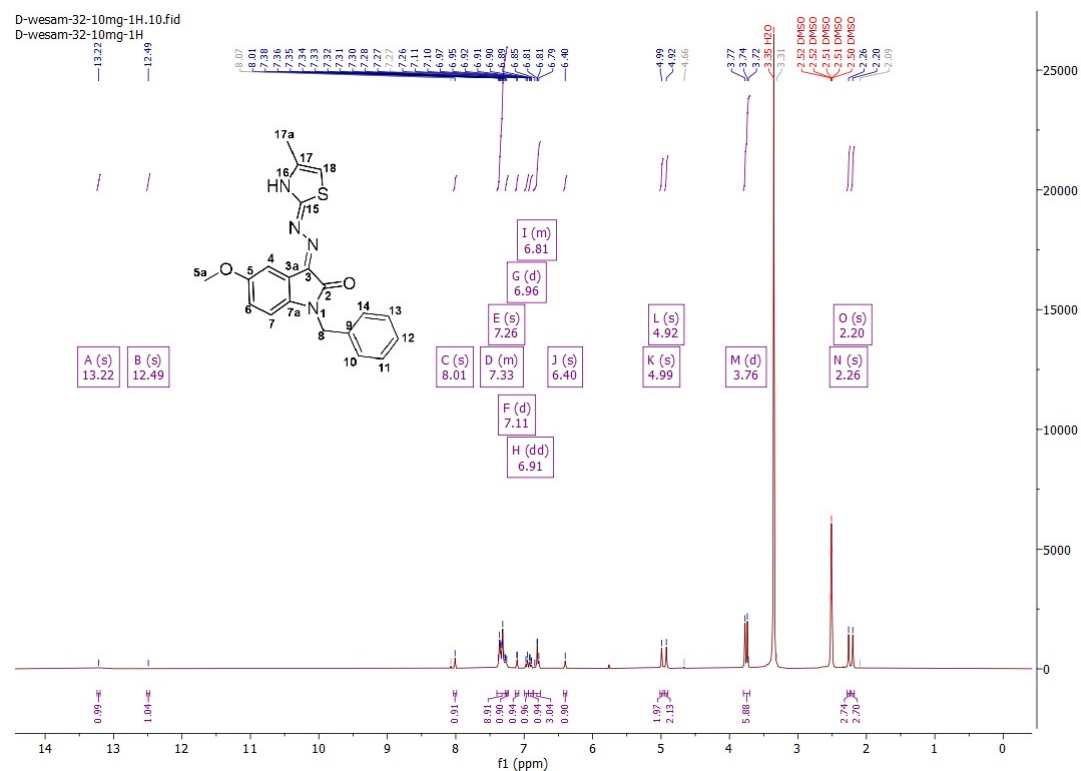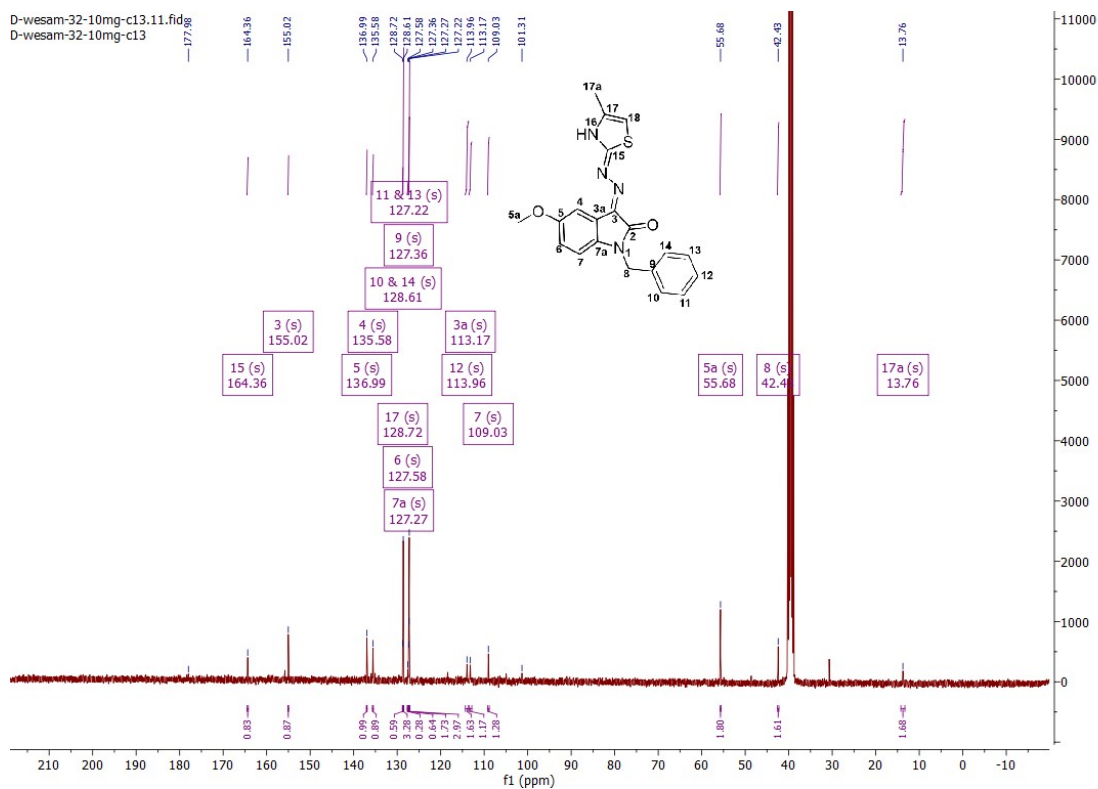

$^1\text{H}$  and  $^{13}\text{C}$  NMR spectra of compound 4h

D-wesam-32-6mg-1H.10.fid  
D-wesam-32-6mg-1H

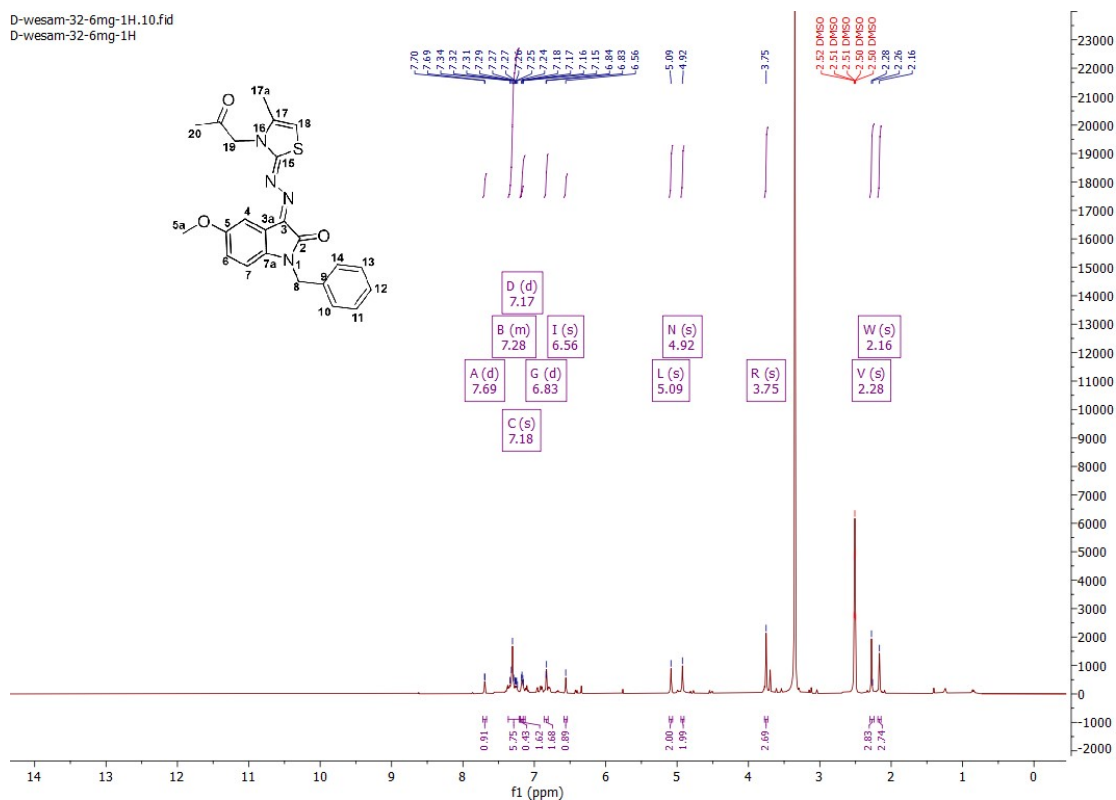

D-wesam-32-6mg-c13.11.fid  
D-wesam-32-6mg-c13

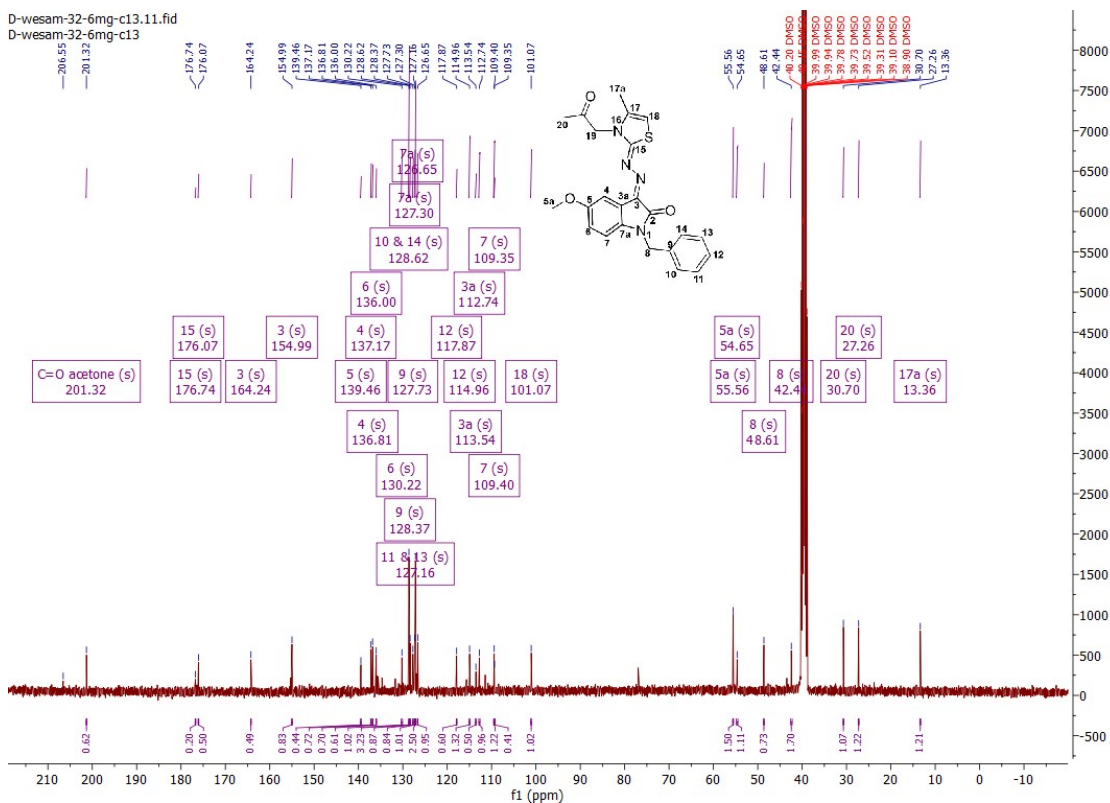

<sup>1</sup>H and <sup>13</sup>C NMR spectra of compound 4i



Mostafa Ahmed-M38-SA-proton.10.fid  
Mostafa Ahmed-M38-SA-proton

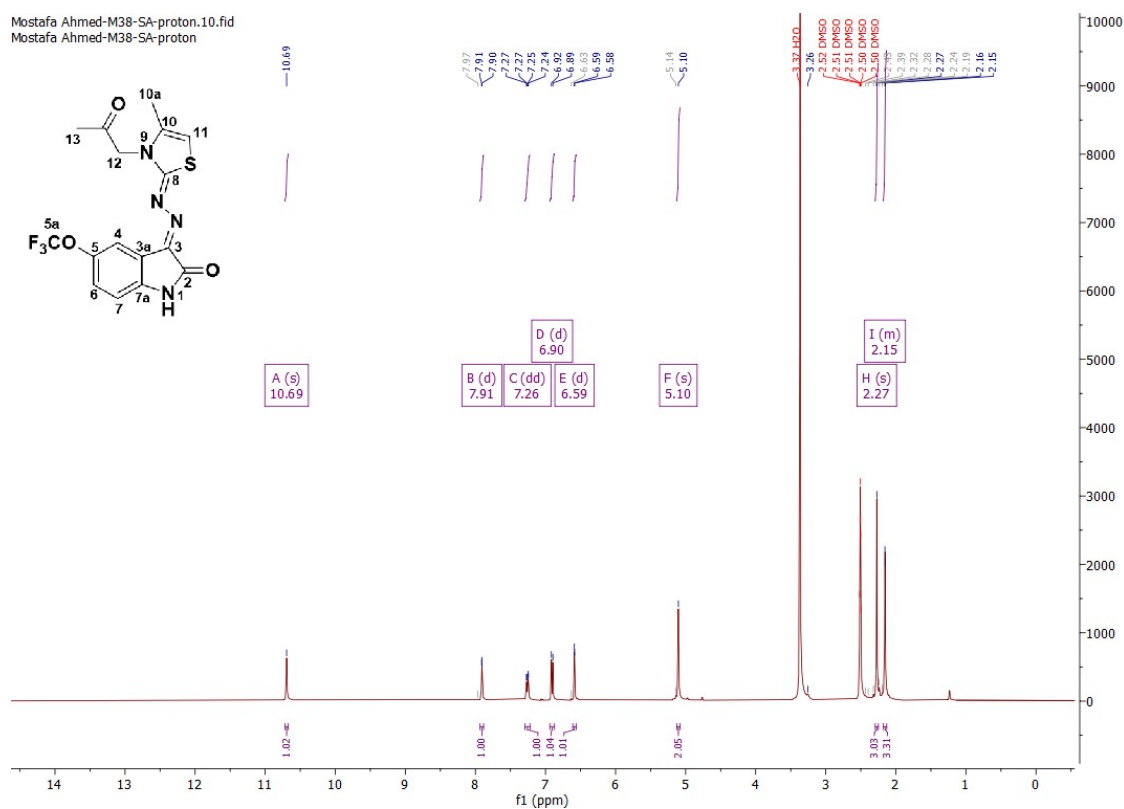

D-wesam-w38-cl3.10.fid  
D-wesam-w38-cl3

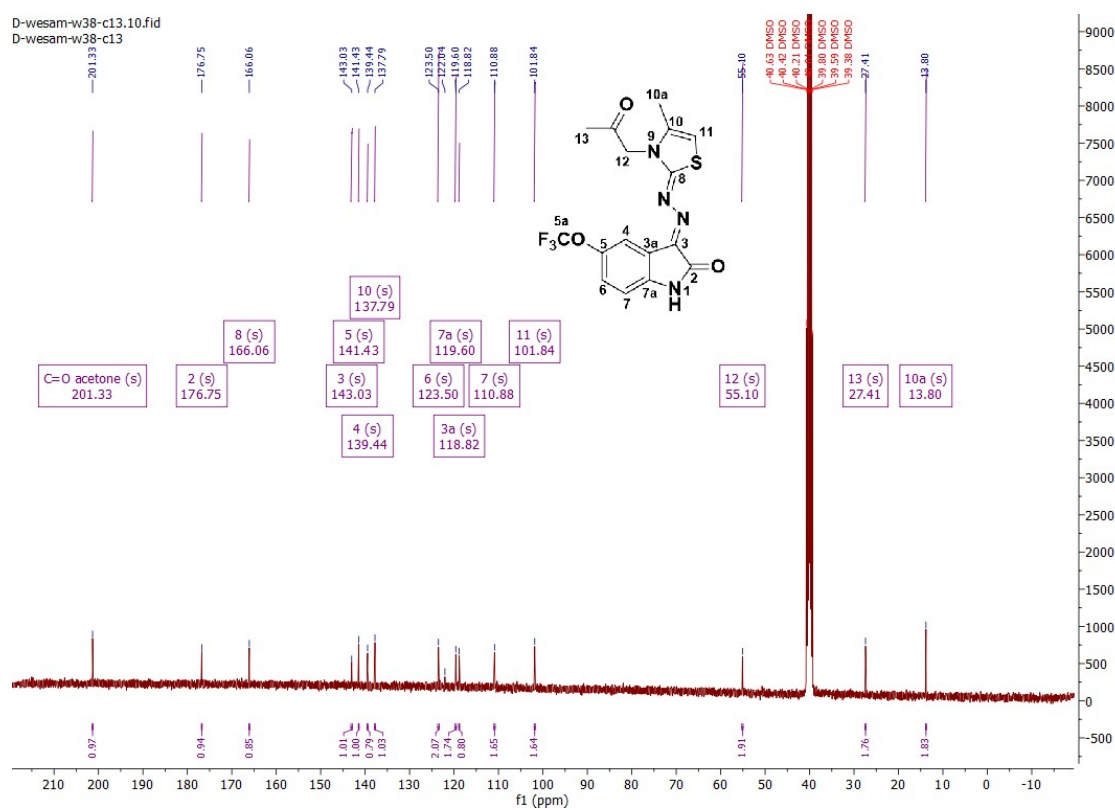

<sup>1</sup>H and <sup>13</sup>C NMR spectra of compound 4j

Mostafa Ahmed-M44-SA-proton.10.fid  
Mostafa Ahmed-M44-SA-proton

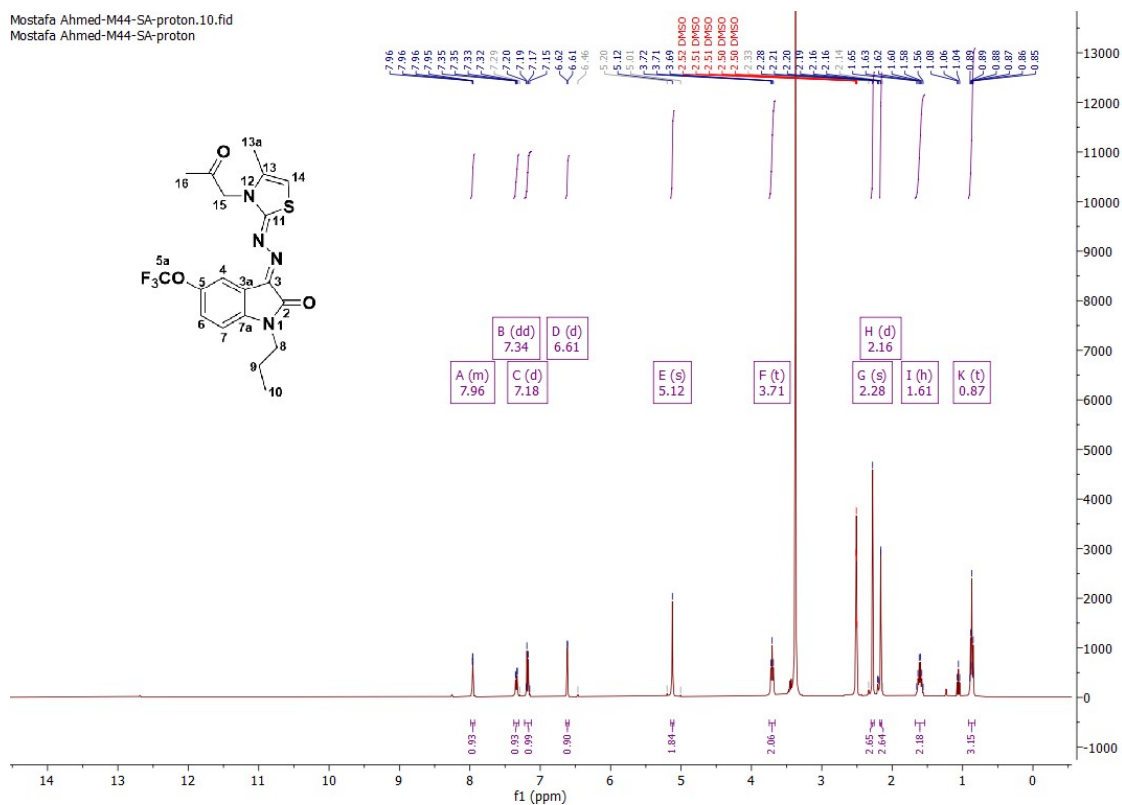

D-wesam-w44-c13.10.fid  
D-wesam-w44-c13

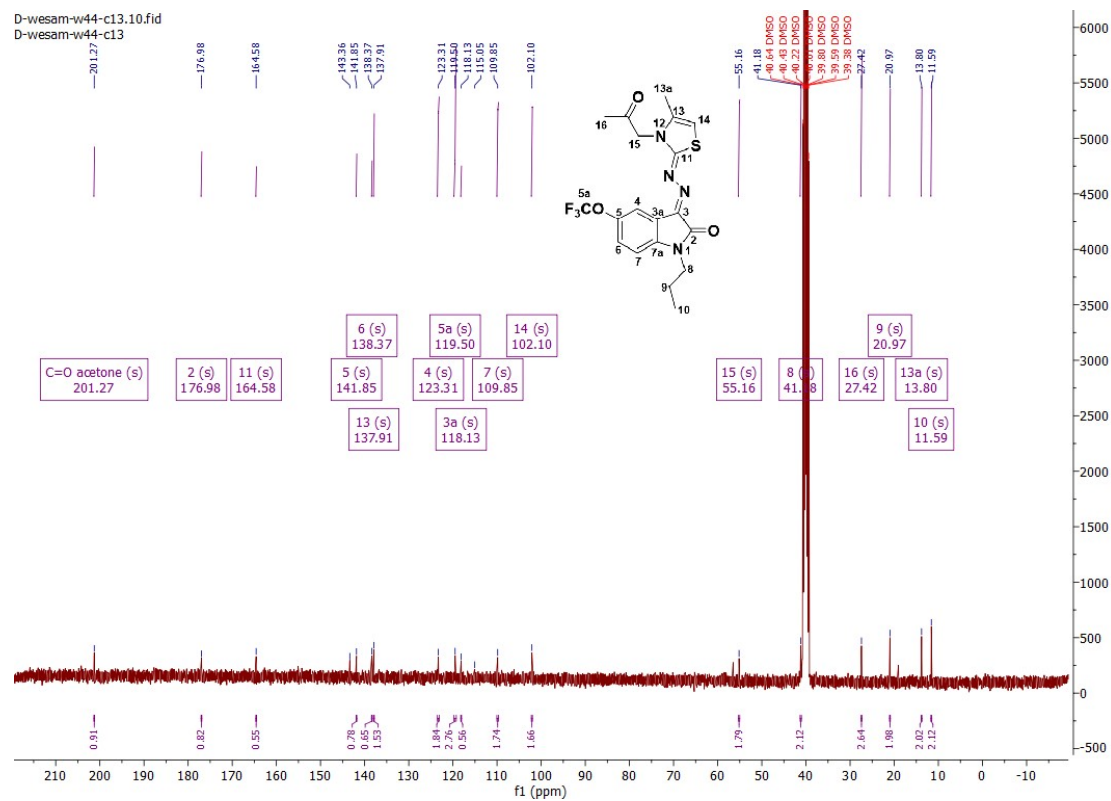

<sup>1</sup>H and <sup>13</sup>C NMR spectra of compound 4k

Jan09-2019.210.fid  
M-50  
proton\_su CDCl3 {C:\nmr-data} Student 13

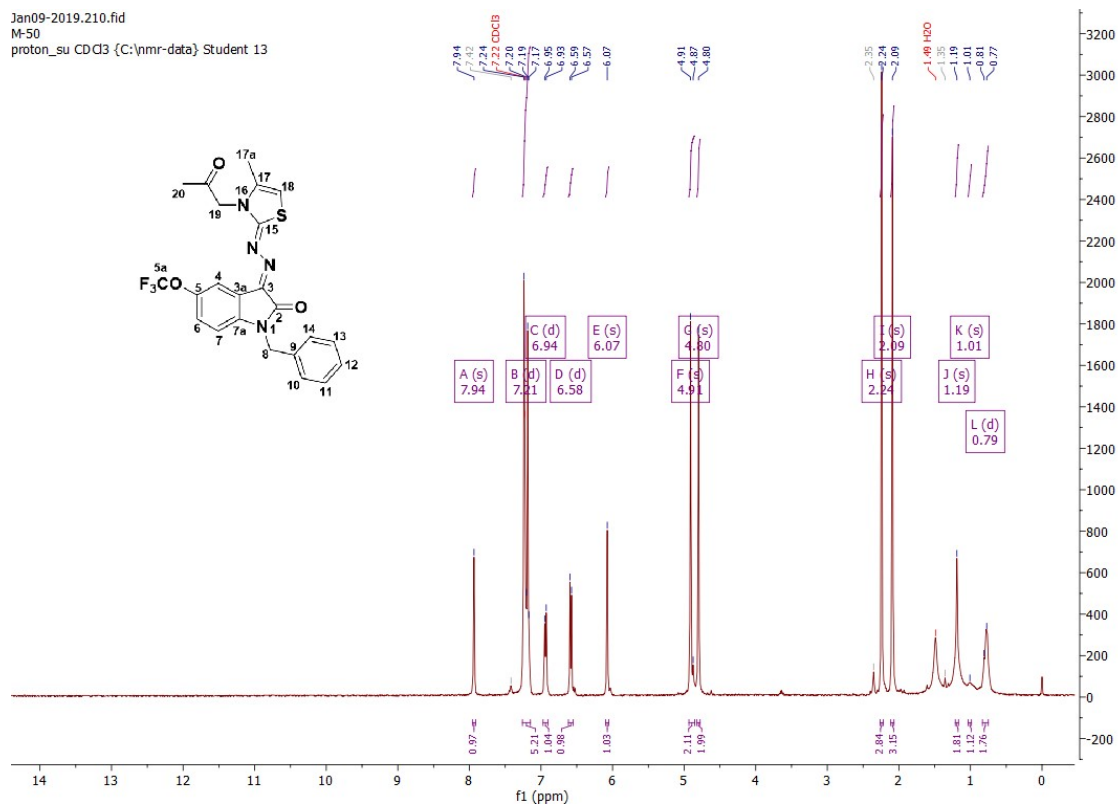

D-wesam-w50-c13.10.fid  
D-wesam-w50-c13

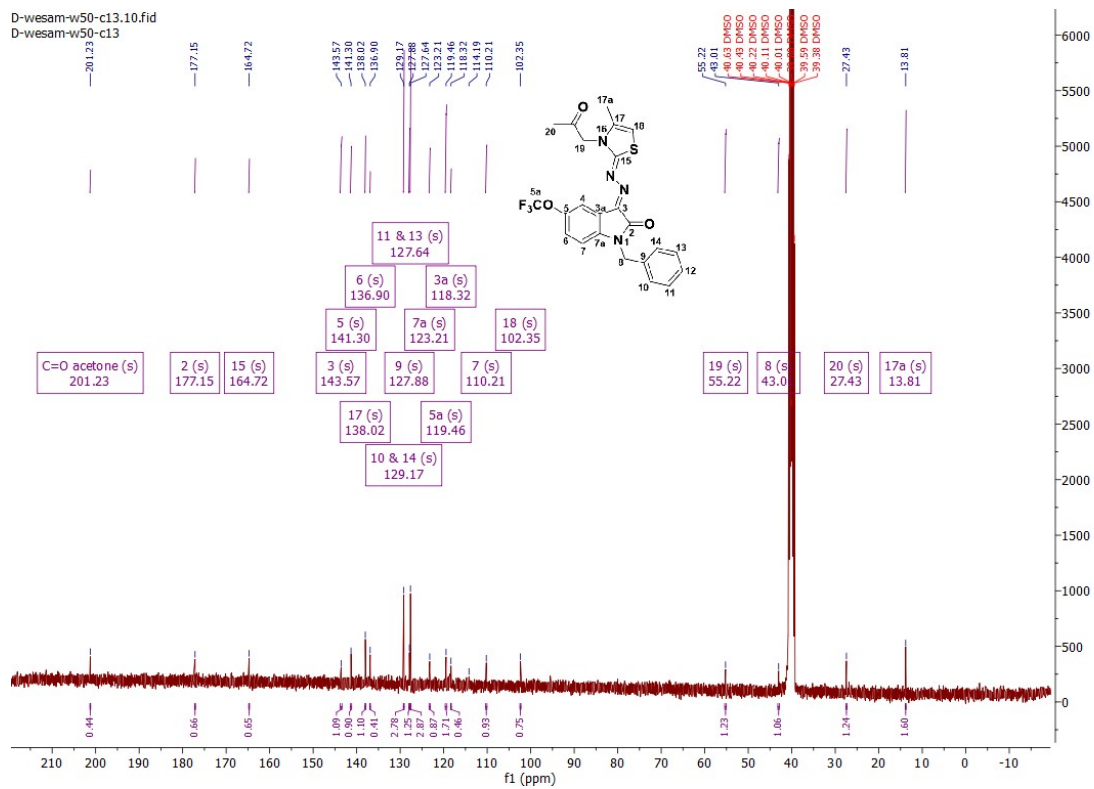

T: FTMS + p ESI Full ms [100.0000-700.0000]

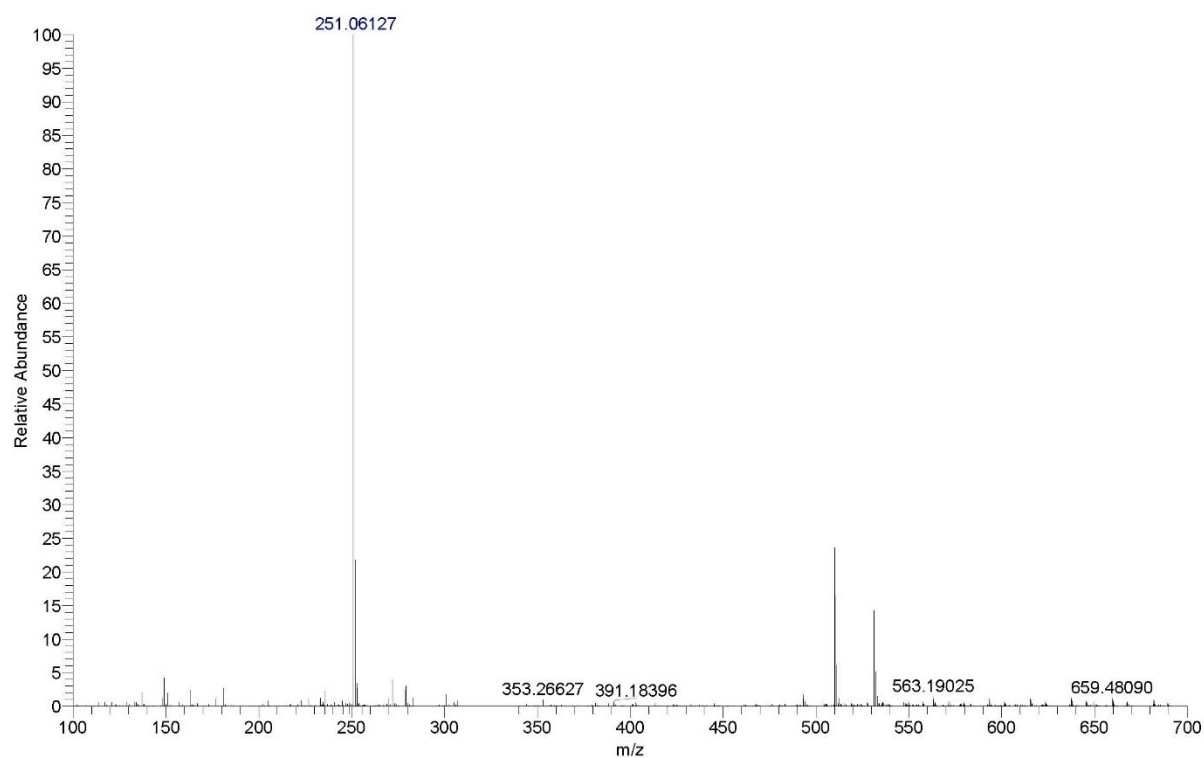

ESI-HRMS Spectrum of Compound **3d**

T: FTMS + p ESI Full ms [100.0000-700.0000]

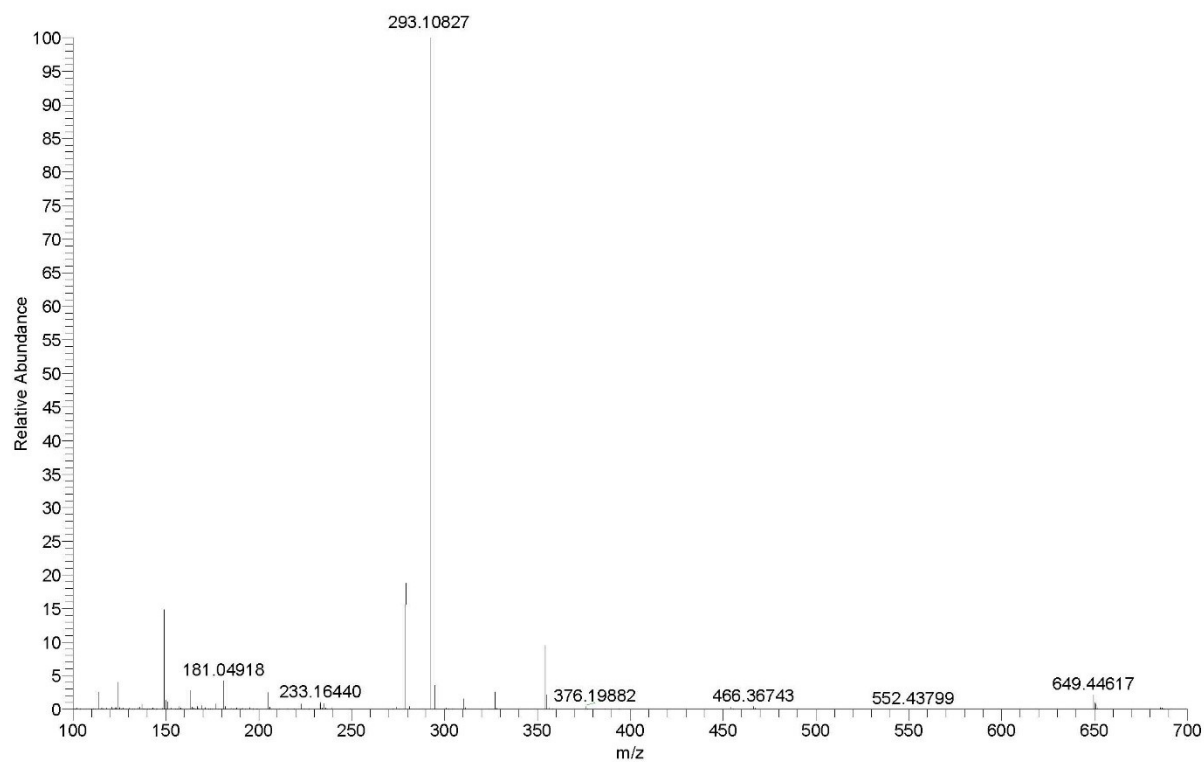

ESI-HRMS Spectrum of Compound **3h**

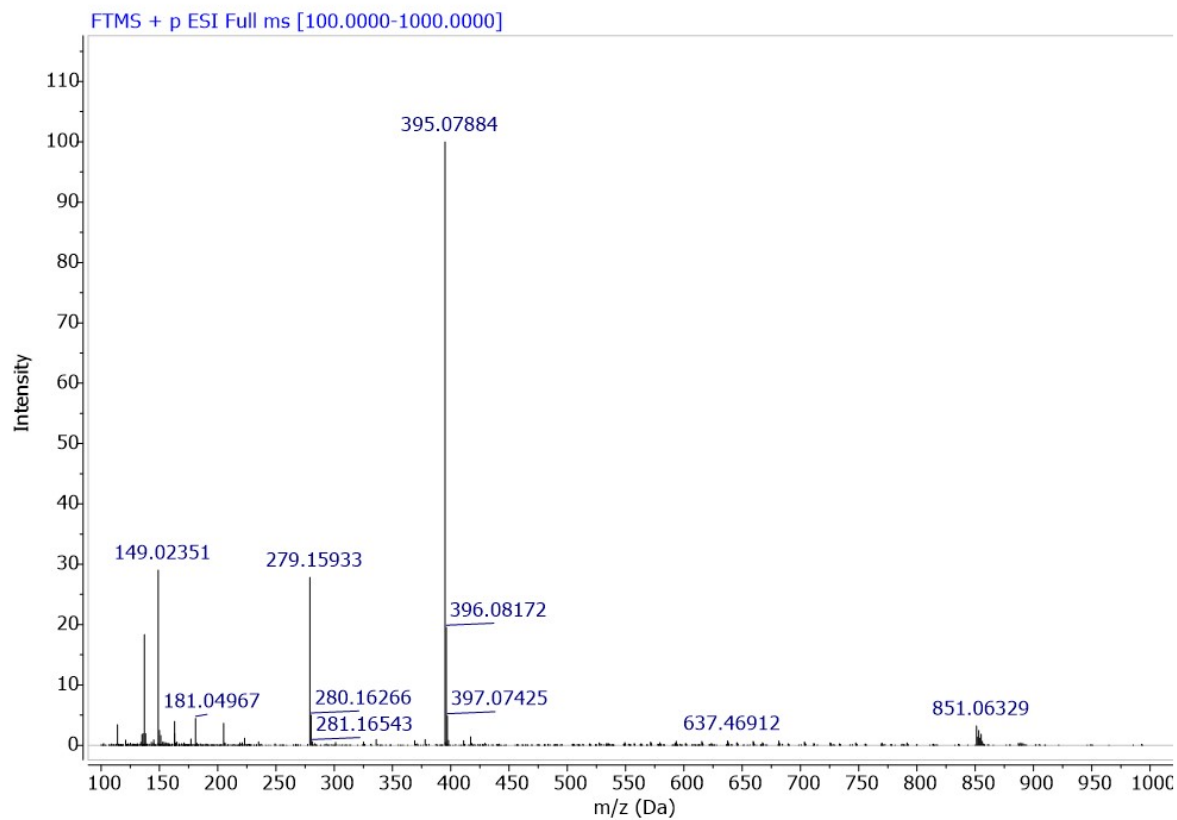

ESI-HRMS Spectrum of Compound **3i**

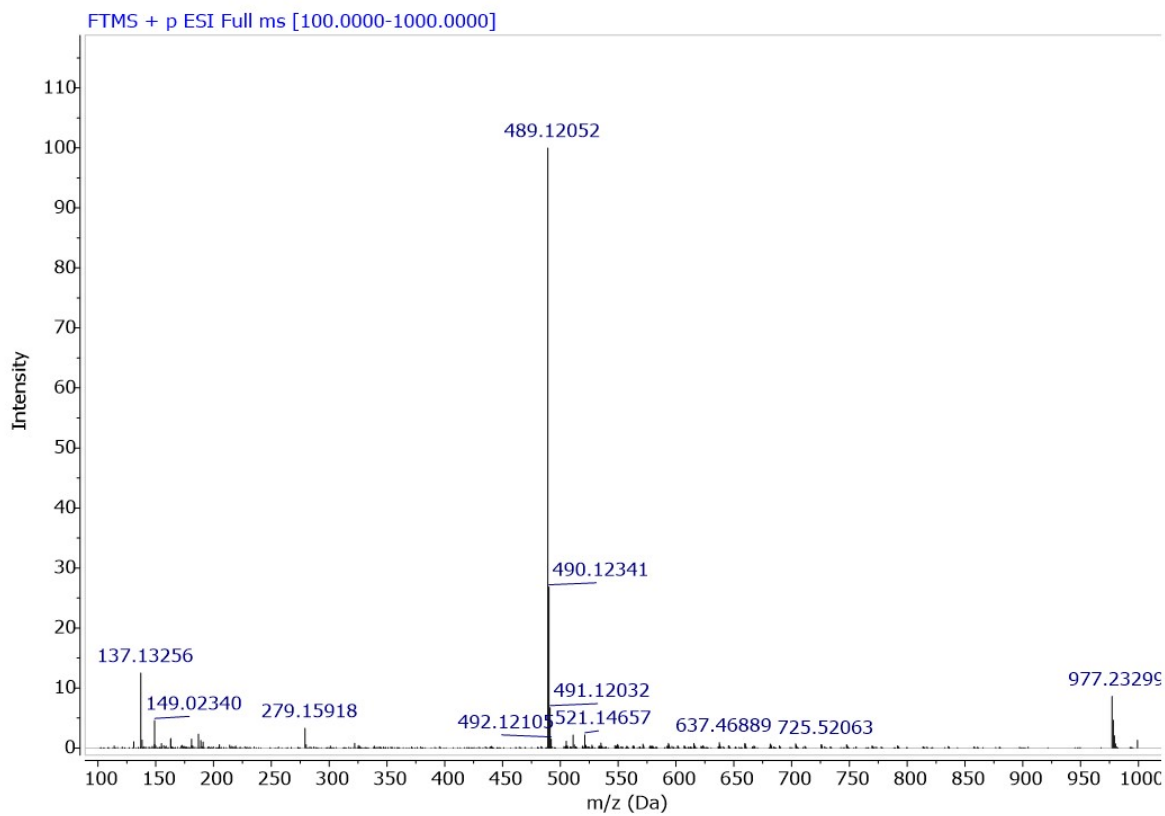

ESI-HRMS Spectrum of Compound **4i**



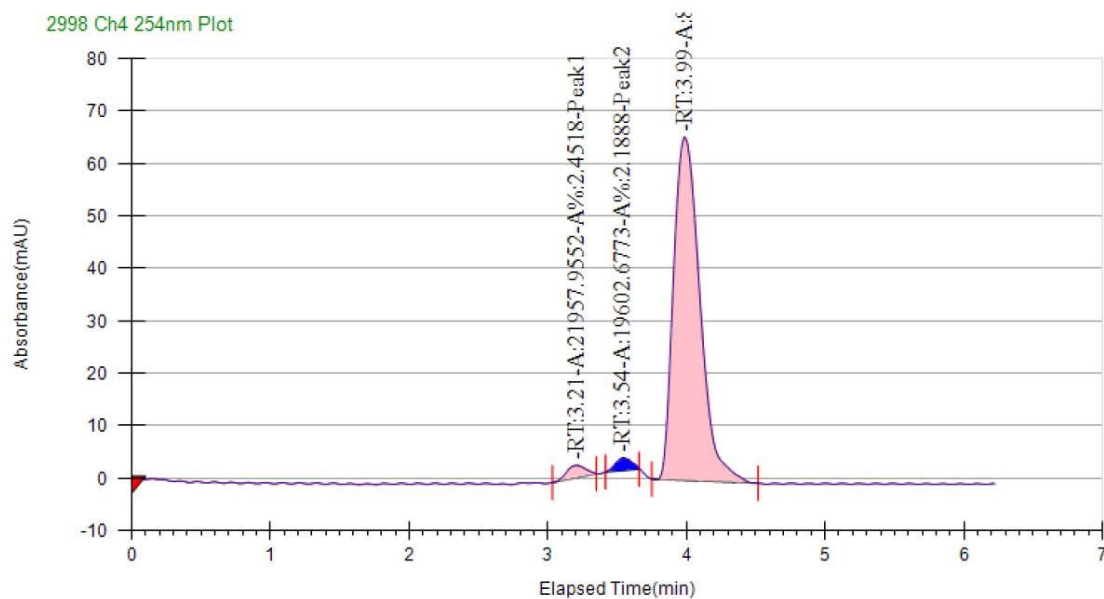

#### General Information

| Log Author | Log Date                | Report By    | Report Date | Notes |
|------------|-------------------------|--------------|-------------|-------|
| Waters     | 9/18/2025<br>2:53:34 PM | Default User | 9/18/2025   |       |

#### Run Information

| Instrument Method | Inj. Vol. (uL) | Sample | Well Location | Flow (ml/min) | Pressure |
|-------------------|----------------|--------|---------------|---------------|----------|
| Halil Şenol - MGM | 50             | WES-10 | 1:A,1         | 5.00          | 144 Bar  |

#### Peak Information

| Peak No | % Area  | Area        | Ret. Time | Height  | Cap. Factor |
|---------|---------|-------------|-----------|---------|-------------|
| 1       | 2.4518  | 21957.9552  | 3.21 min  | 2.3534  | 3207.3333   |
| 2       | 2.1888  | 19602.6773  | 3.54 min  | 2.417   | 3540.6667   |
| 3       | 95.3595 | 854040.6659 | 3.99 min  | 65.4151 | 3990.6667   |

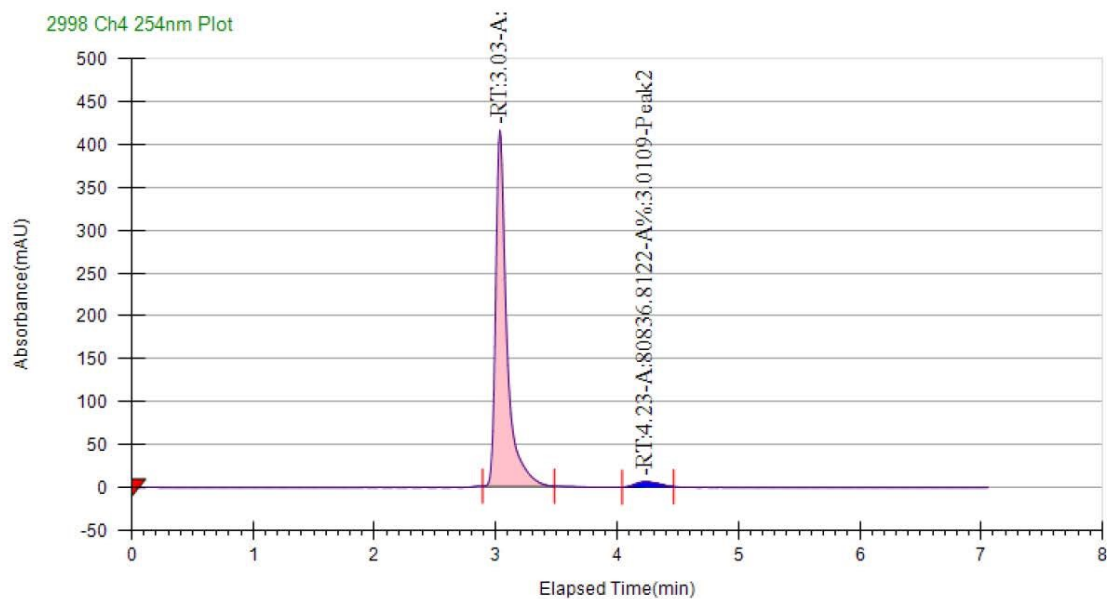

#### General Information

| Log Author | Log Date                | Report By    | Report Date | Notes |
|------------|-------------------------|--------------|-------------|-------|
| Waters     | 9/18/2025<br>3:08:22 PM | Default User | 9/18/2025   |       |

#### Run Information

| Instrument Method | Inj. Vol. (uL) | Sample | Well Location | Flow (ml/min) | Pressure |
|-------------------|----------------|--------|---------------|---------------|----------|
| Halil Şenol - MGM | 200            | WES-22 | 1:A,2         | 5.00          | 145 Bar  |

#### Peak Information

| Peak No | % Area  | Area         | Ret. Time | Height   | Cap. Factor |
|---------|---------|--------------|-----------|----------|-------------|
| 1       | 96.9891 | 2603995.0791 | 3.03 min  | 414.7027 | 0           |
| 2       | 3.0109  | 80836.8122   | 4.23 min  | 6.2272   | 0           |

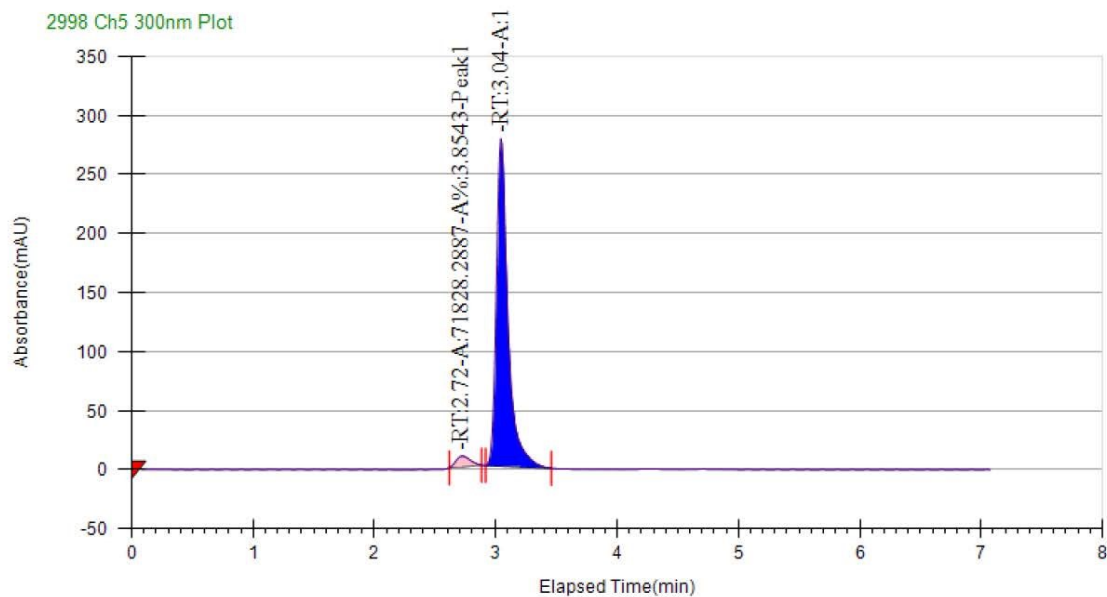

#### General Information

| Log Author | Log Date                | Report By    | Report Date | Notes |
|------------|-------------------------|--------------|-------------|-------|
| Waters     | 9/18/2025<br>3:16:01 PM | Default User | 9/18/2025   |       |

#### Run Information

| Instrument Method | Inj. Vol. (uL) | Sample | Well Location | Flow (ml/min) | Pressure |
|-------------------|----------------|--------|---------------|---------------|----------|
| Halil Şeno - MGM  | 200            | WES-25 | 1:A,3         | 5.00          | 149 Bar  |

#### Peak Information

| Peak No | % Area  | Area         | Ret. Time | Height   | Cap. Factor |
|---------|---------|--------------|-----------|----------|-------------|
| 1       | 3.8543  | 71828.2887   | 2.72 min  | 9.082    | 0           |
| 2       | 96.1457 | 1791768.4646 | 3.04 min  | 277.4202 | 0           |

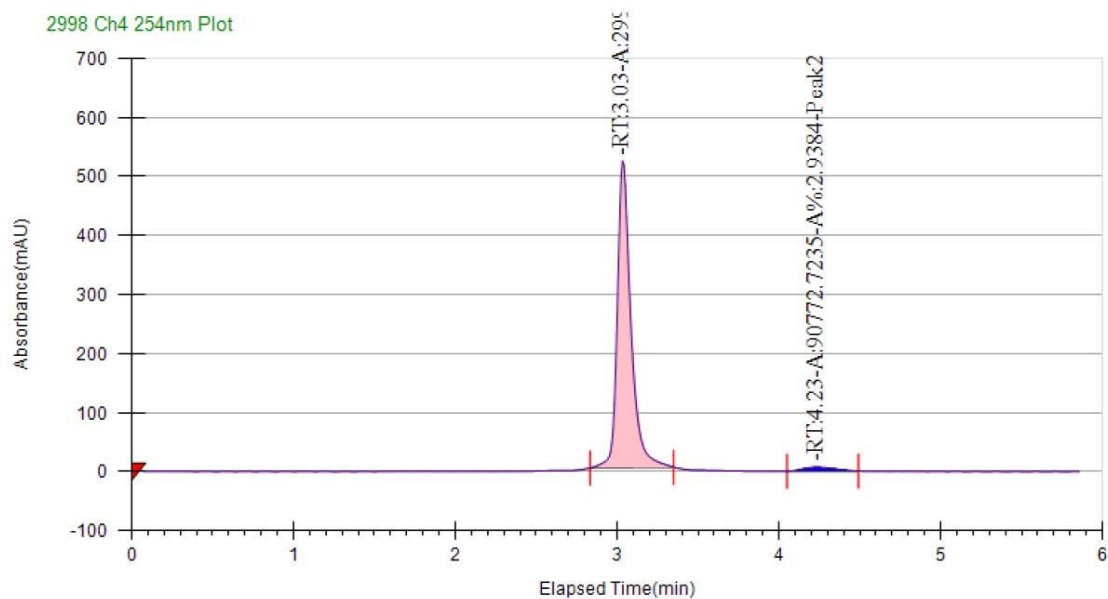

#### General Information

| Log Author | Log Date                | Report By    | Report Date | Notes |
|------------|-------------------------|--------------|-------------|-------|
| Waters     | 9/18/2025<br>3:23:43 PM | Default User | 9/18/2025   |       |

#### Run Information

| Instrument Method | Inj. Vol. (uL) | Sample | Well Location | Flow (ml/min) | Pressure |
|-------------------|----------------|--------|---------------|---------------|----------|
| Halil Şenol - MGM | 200            | WES-50 | 1:A,4         | 5.00          | 147 Bar  |

#### Peak Information

| Peak No | % Area  | Area         | Ret. Time | Height   | Cap. Factor |
|---------|---------|--------------|-----------|----------|-------------|
| 1       | 97.0616 | 2998394.5526 | 3.03 min  | 519.7087 | 0           |
| 2       | 2.9384  | 90772.7235   | 4.23 min  | 6.6846   | 0           |
